# Supplementary material for: Guide RNAs containing universal bases enable Cas9/Cas12a recognition of polymorphic sequences
Source: PubMed Central journal article supplement (PMC8956631; doi:10.1038/s41467-022-29202-x), 2022-03-25
Supplement: 41467_2022_29202_MOESM1_ESM.pdf [file 41467_2022_29202_MOESM1_ESM.pdf]

**Guide RNAs containing universal bases enable Cas9/Cas12a recognition of polymorphic sequences**

*Amanda R. Kryslar, Christopher R. Cromwell, Tommy Tu, Juan Jovel, Basil P. Hubbard*

**Supplementary Information**

|                                |                                                                                                                       |
|--------------------------------|-----------------------------------------------------------------------------------------------------------------------|
| <b>Supplementary Figure 1</b>  | <b>Applications of universal bases to CRISPR/Cas9 and CRISPR/Cas12a systems.</b>                                      |
| <b>Supplementary Figure 2</b>  | <b><i>In vitro</i> cleavage of ABO variant sequences by Cas9 using ABO-RNA.</b>                                       |
| <b>Supplementary Figure 3</b>  | <b>Cleavage of polymorphic sequences by Cas9 using crRNAs containing universal bases.</b>                             |
| <b>Supplementary Figure 4</b>  | <b><i>In vitro</i> activity of inosine-modified crRNAs on ABO-T1 target.</b>                                          |
| <b>Supplementary Figure 5</b>  | <b>Effect of inosine modifications on the kinetics and activity of Cas9.</b>                                          |
| <b>Supplementary Figure 6</b>  | <b>Effect of inosine modifications in crRNAs on the ability of dCas9 to bind target DNA.</b>                          |
| <b>Supplementary Figure 7</b>  | <b>Relationship between cleavage activity and target engagement of Cas9 using inosine-modified crRNAs.</b>            |
| <b>Supplementary Figure 8</b>  | <b>Effect of ribose inosine modifications on crRNA-DNA target heteroduplex melting temperature.</b>                   |
| <b>Supplementary Figure 9</b>  | <b>Distribution of mutations in pre- and post-selection libraries for ABO-RNA and inosine-modified crRNAs.</b>        |
| <b>Supplementary Figure 10</b> | <b>Change in specificity score of inosine-modified crRNAs compared to ABO-RNA.</b>                                    |
| <b>Supplementary Figure 11</b> | <b>Average specificity score of ribose inosine modified positions in the ABO crRNAs.</b>                              |
| <b>Supplementary Figure 12</b> | <b>Distribution of mutations in pre- and post-selection libraries for ABO-RNA and universal base-modified crRNAs.</b> |
| <b>Supplementary Figure 13</b> | <b><i>In vitro</i> specificity profiles for ABO crRNAs containing various universal base modifications.</b>           |
| <b>Supplementary Figure 14</b> | <b>Change in specificity score of universal base-modified crRNAs compared to ABO-RNA.</b>                             |
| <b>Supplementary Figure 15</b> | <b>Average specificity score of universal base modified positions in the ABO crRNAs.</b>                              |
| <b>Supplementary Figure 16</b> | <b>Distribution of mutations in pre- and post-selection libraries for HLA-RNA and inosine-modified crRNAs.</b>        |
| <b>Supplementary Figure 17</b> | <b><i>In vitro</i> specificity profiles for HLA crRNAs containing inosine base modifications.</b>                     |

|                         |                                                                                                                                                            |
|-------------------------|------------------------------------------------------------------------------------------------------------------------------------------------------------|
| Supplementary Figure 18 | Change in specificity score of inosine-modified crRNAs compared to HLA-RNA.                                                                                |
| Supplementary Figure 19 | Average specificity score of ribose inosine modified positions in the <i>HLA</i> crRNAs.                                                                   |
| Supplementary Figure 20 | Cas9 cleavage activity using HLA-C-RNA and universal base-modified crRNAs <i>in vitro</i> and on the endogenous <i>HLA-C</i> locus in 293T and HeLa cells. |
| Supplementary Figure 21 | <i>In vitro</i> Cas9 cleavage kinetics using HLA-C-RNA or universal base-modified crRNAs.                                                                  |
| Supplementary Figure 22 | Titration of Cas12a RNP containing HIV-RNA or HIV-rl-1 against select target sequences <i>in vitro</i> .                                                   |
| Supplementary Figure 23 | Cleavage of HIV target sequences by Cas12a with unmodified and inosine modified crRNAs in cells.                                                           |
| Supplementary Table 1   | Sequences of crRNAs and tracrRNA.                                                                                                                          |
| Supplementary Table 2   | Sequences of oligonucleotides.                                                                                                                             |

**a CRISPR/Cas9 System**

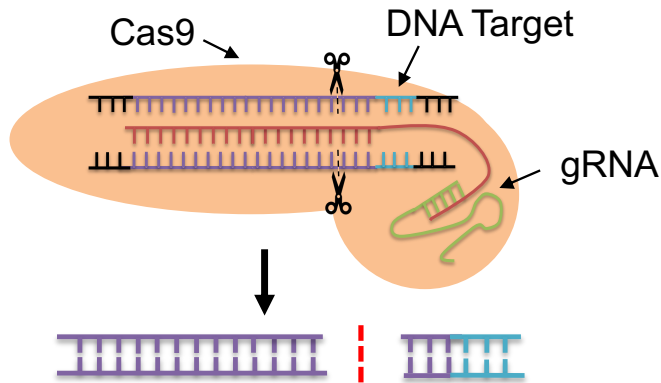

**b CRISPR/Cas12a System**

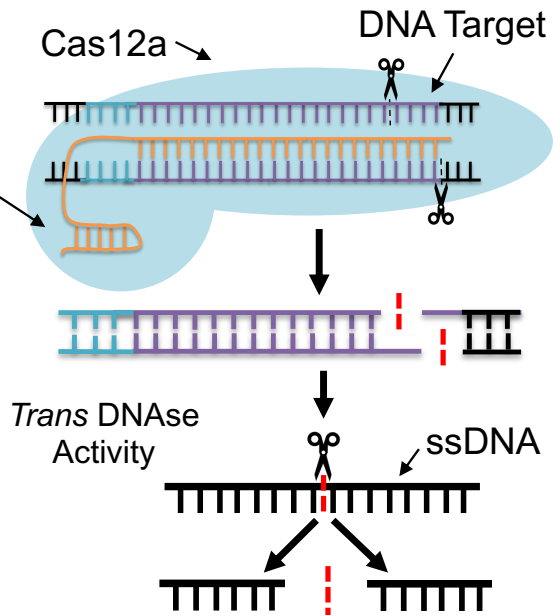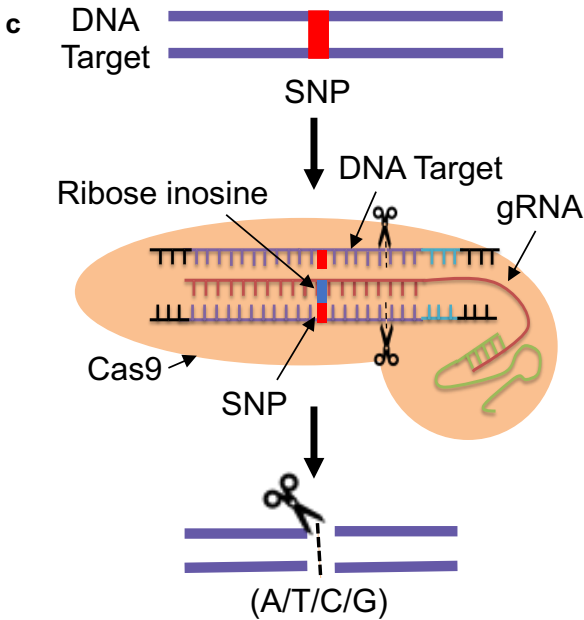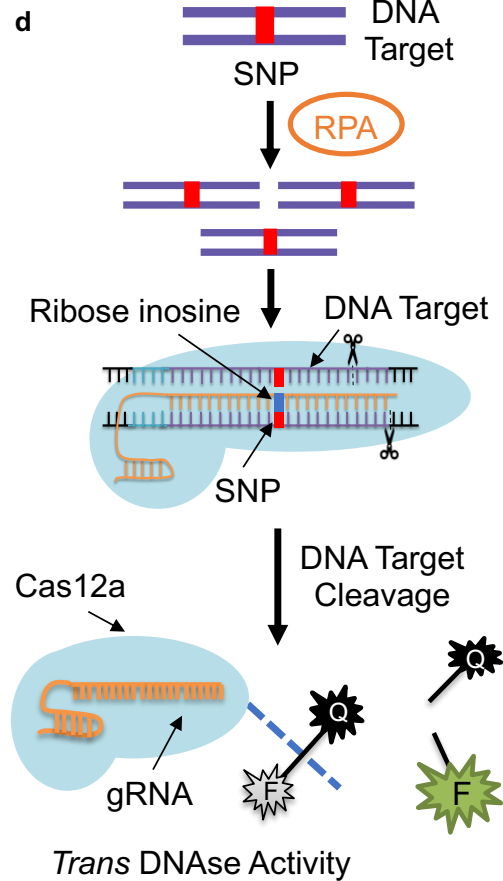

**Supplementary Figure 1. Applications of universal bases to CRISPR/Cas9 and CRISPR/Cas12a systems.** **a** Diagram outlining the CRISPR/Cas9 DNA cleavage mechanism. After forming a ribonucleoprotein complex with a designed gRNA, Cas9 identifies its DNA target sequence based on the presence of a PAM sequence (blue section of the DNA target) and base-pair interactions between the DNA and the 20-nt spacer sequence of the gRNA. If successful pairing occurs, Cas9 induces a blunt, double-strand cut in the DNA. **b** Diagram outlining the CRISPR/Cas12a DNA cleavage mechanism. After forming a ribonucleoprotein complex with a designed gRNA, Cas12 identifies its DNA target sequence based on the presence of a PAM sequence (blue section of the DNA target) and base-pair interactions between the DNA and the 23-25-nt spacer sequence of the gRNA. If a highly matched sequence is found, Cas12a induces a staggered double-strand DNA cut in the target (*cis* cleavage). In addition, this process activates the collateral, or *trans* DNase activity of Cas12a which acts to subsequently degrade nearby ssDNA in a non-specific manner. Diagrams depicting applications where universal bases substituted into the gRNA could **c** enable the simultaneous targeting/cleavage of multiple DNA sequence variants in cells or **d** allow for the detection of polymorphic sequences. ‘SNP’ denotes single nucleotide polymorphism, ‘RPA’ denotes recombinase polymerase amplification, ‘F’ denotes fluorophore, and ‘Q’ denotes quencher.

| a Target | DNA Sequence (5'→3')                             | # of SNPs | Target  | DNA Sequence (5'→3')                             | # of SNPs |
|----------|--------------------------------------------------|-----------|---------|--------------------------------------------------|-----------|
| ABO-T1   | CATGGAGTTCCGCGACCACG <u>TGG</u>                  | 0         | ABO-T9  | CATGGAGTTC <u>T</u> GCGACCACG <u>TGG</u>         | 1         |
| ABO-T2   | CATGGAG <u>A</u> TCCGCGACCACG <u>TGG</u>         | 1         | ABO-T10 | CATGGAG <u>A</u> TCTGCGACCACG <u>TGG</u>         | 2         |
| ABO-T3   | CATGGAGTTCCGCGACC <u>A</u> <u>TGG</u>            | 1         | ABO-T11 | CATGGAGTTC <u>T</u> GCGACC <u>A</u> <u>TGG</u>   | 2         |
| ABO-T4   | CATGGAGTTCCGCGACCAC <u>A</u> <u>TGG</u>          | 1         | ABO-T12 | CATGGAGTTC <u>T</u> GCGACCAC <u>A</u> <u>TGG</u> | 2         |
| ABO-T5   | CATGGAG <u>A</u> TCCGCGACCAC <u>A</u> <u>TGG</u> | 2         | ABO-T13 | CATGGAG <u>A</u> TCTGCGACC <u>A</u> <u>TGG</u>   | 3         |
| ABO-T6   | CATGGAG <u>A</u> TCCGCGACC <u>A</u> <u>TATGG</u> | 3         | ABO-T14 | CATGGAG <u>A</u> TCTGCGACCAC <u>A</u> <u>TGG</u> | 3         |
| ABO-T7   | CATGGAG <u>A</u> TCCGCGACC <u>A</u> <u>TGTGG</u> | 2         | ABO-T15 | CATGGAGTTC <u>T</u> GCGACC <u>A</u> <u>TATGG</u> | 3         |
| ABO-T8   | CATGGAGTTCGCGACC <u>A</u> <u>TATGG</u>           | 2         | ABO-T16 | CATGGAG <u>A</u> TCTGCGACC <u>A</u> <u>TATGG</u> | 4         |

b **ABO-RNA: 5'-CAUGGAGUCCGCGACCACG-3'**

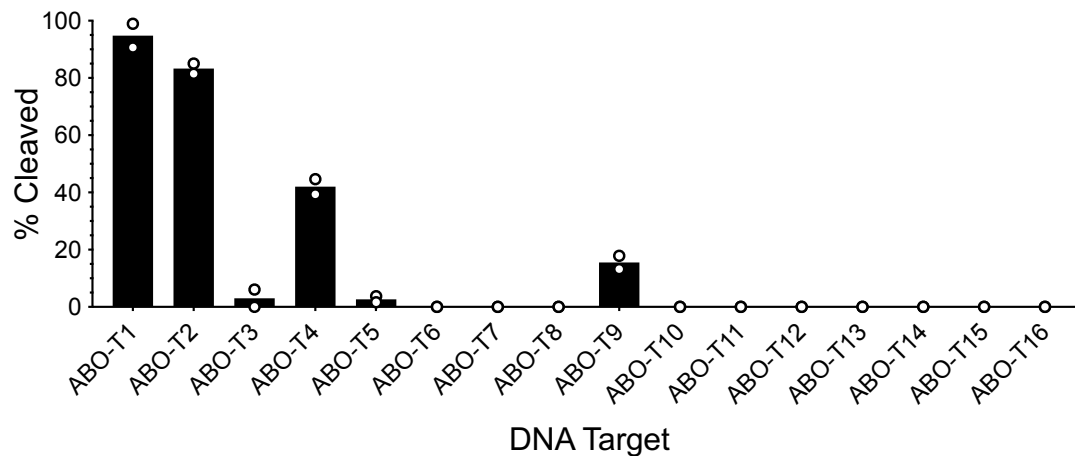

### Supplementary Figure 2. *In vitro* cleavage of *ABO* variant sequences by Cas9

using **ABO-RNA**. **a** List of DNA targets corresponding to sequences in the *ABO* gene based on clinical polymorphism data. SNPs are indicated with red lettering. The PAM sequence is underlined. **b** Bar graph showing the relative amount of DNA cleavage resulting from *in vitro* reactions containing Cas9 with ABO-RNA versus the indicated DNA target sequences; Mean with individual data points shown (n = 2 independent experiments). Cleavage percentages were calculated from corresponding agarose gels using densitometry software (ImageJ).

| a | Target        | DNA Sequence (5'→3')    | Allele Frequency (%) |
|---|---------------|-------------------------|----------------------|
|   | <b>ABO-T5</b> | CATGGAGATCCGCGACCACATGG | 0.0038               |
|   | <b>ABO-T6</b> | CATGGAGATCCGCGACCATATGG | 0.00061              |

b

**ABO-RNA:** 5'-CAUGGAGUCCGCGACCACG-3'

[\*] = Modification

**crRNA:** 5'-CAUGGAG[\*]UCCGCGACCAC[\*]-3'

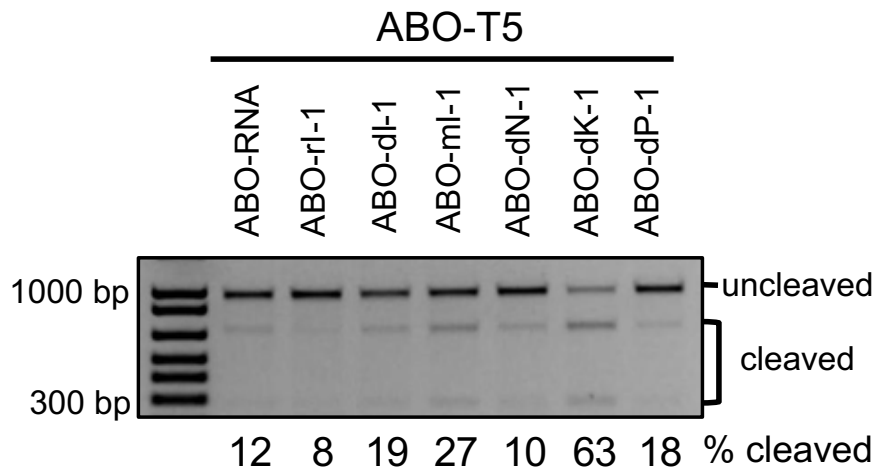

c

**ABO-RNA:** 5'-CAUGGAGUCCGCGACCACG-3'

[\*] = Modification

**crRNA:** 5'-CAUGGAG[\*]UCCGCGACCA[\*][\*]-3'

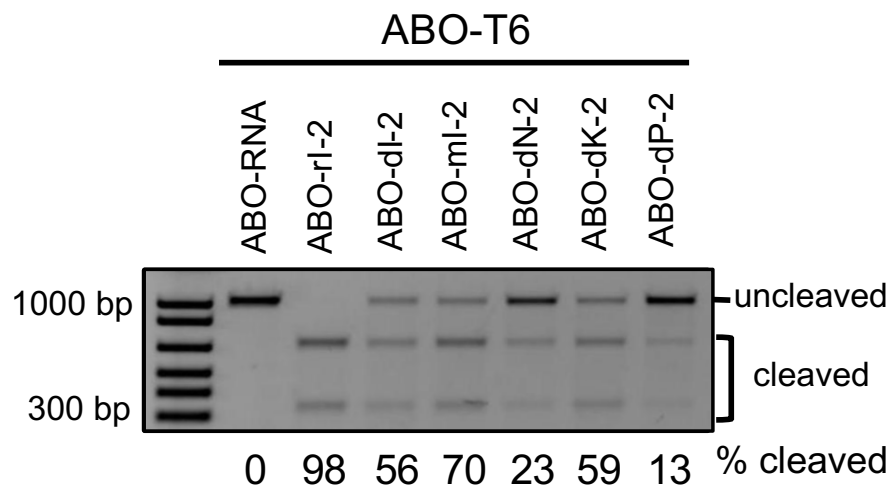

**Supplementary Figure 3. Cleavage of polymorphic sequences by Cas9 using crRNAs containing universal bases.** **a** List of DNA target sequences. SNPs are indicated with red lettering. The PAM sequence is underlined. Representative gels showing cleavage of **b** ABO-T5 or **c** ABO-T6 DNA targets by Cas9 using the indicated crRNAs. The bottom two bands in the gel represent the cleaved DNA substrate while the top band corresponds to the undigested substrate. Reactions were performed using fixed concentrations of gRNA (80 nM) and Cas9 (40 nM). Quantification of cleavage percentages was performed using ImageJ. Cleavage experiments were performed in duplicate with similar results.

| a | Name     | crRNA Sequence (5'→3')     | Name      | crRNA Sequence (5'→3')       |
|---|----------|----------------------------|-----------|------------------------------|
|   | ABO-RNA  | CAUGGAGUUCGCGACCACG        | ABO-ri-8  | CAUGGAG[U]UCCGCGACCA[U]G     |
|   | ABO-ri-1 | CAUGGAG[U]UCCGCGACCAC[U]   | ABO-ri-9  | CAUGGAGUUC[U]GCGACCA[U]G     |
|   | ABO-ri-2 | CAUGGAG[U]UCCGCGACCA[U][U] | ABO-ri-10 | CAUGGAGUUC[U]GCGACCAC[U]     |
|   | ABO-ri-3 | CAUGGAG[U]UCCGCGACCACG     | ABO-ri-11 | CAUGGAGUUCGCGACCA[U][U]      |
|   | ABO-ri-4 | CAUGGAGUUC[U]GCGACCACG     | ABO-ri-12 | CAUGGAG[U]UC[U]GCGACCA[U]G   |
|   | ABO-ri-5 | CAUGGAGUUCGCGACCA[U]G      | ABO-ri-13 | CAUGGAG[U]UC[U]GCGACCAC[U]   |
|   | ABO-ri-6 | CAUGGAGUUCGCGACCAC[U]      | ABO-ri-14 | CAUGGAGUUC[U]GCGACCA[U][U]   |
|   | ABO-ri-7 | CAUGGAG[U]UC[U]GCGACCACG   | ABO-ri-15 | CAUGGAG[U]UC[U]GCGACCA[U][U] |

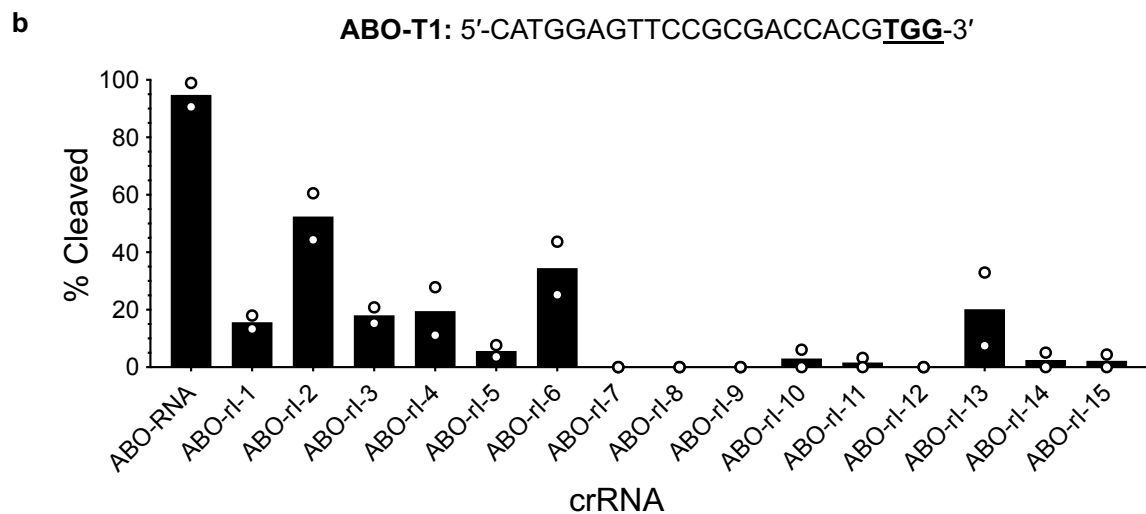

**Supplementary Figure 4. *In vitro* activity of inosine-modified crRNAs on ABO-T1 target.** **a** List of modified crRNA sequences with inosine position(s) indicated by a red [U]. **b** Bar graph showing the relative amount of DNA cleavage resulting from *in vitro* reactions using the indicated inosine-modified crRNAs versus the ABO-T1 target sequence; Mean with individual data points shown (n = 2 independent experiments). Reactions were performed using fixed concentrations of gRNA (80 nM) and Cas9 (40 nM). Quantification of cleavage percentages was performed using ImageJ.



**a**

| Name     | crRNA Sequence (5'→3')                                                                     |
|----------|--------------------------------------------------------------------------------------------|
| ABO-RNA  | CAUGGAGUCCGCGACCACG                                                                        |
| ABO-rl-1 | CAUGGAG[ <span style="color:red"> </span> ]UCCGCGACCAC[ <span style="color:red"> </span> ] |
| ABO-rl-8 | CAUGGAG[ <span style="color:red"> </span> ]UCCGCGACCA[ <span style="color:red"> </span> ]G |

**ABO-T1 Target:** 5'- CATGGAGTTCCGCGACCACGTGG -3'

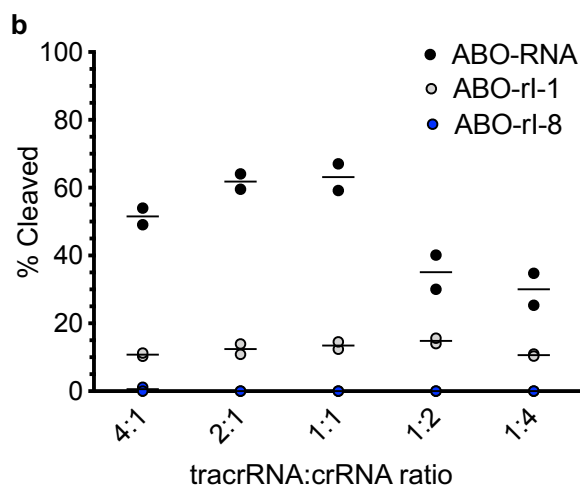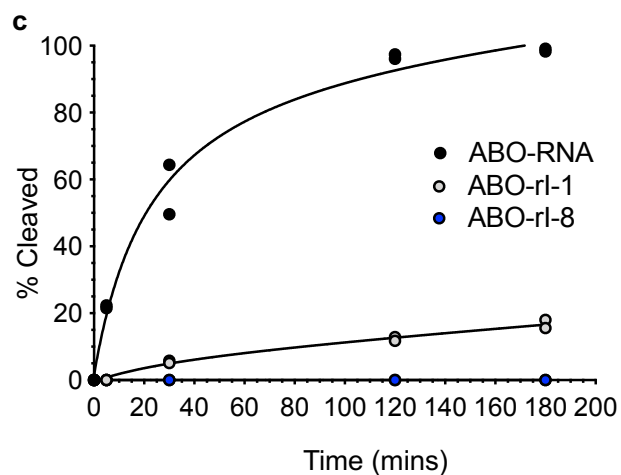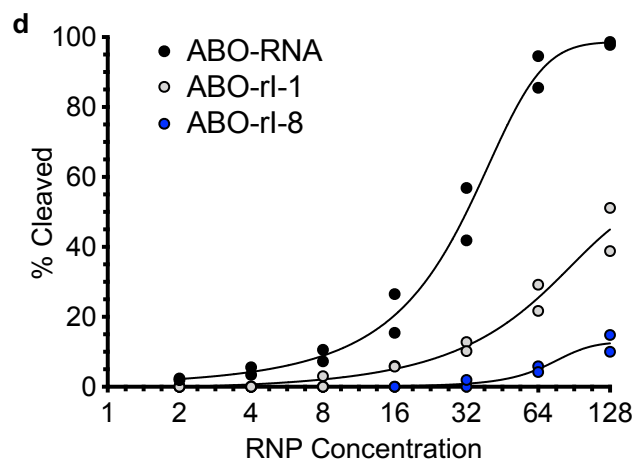

**Supplementary Figure 5. Effect of inosine modifications on the kinetics and activity of Cas9.** **a** List of inosine-modified crRNA sequences. A red [I] indicates the position of ribose inosine modifications in the crRNA sequence. **b** Graph showing Cas9 cleavage activity as a function of the tracrRNA:crRNA using either ABO-RNA, ABO-ri-1, or ABO-ri-8 versus the ABO-T1 target sequence; Mean with individual data points shown (n = 2 independent experiments). **c** Time course of Cas9 cleavage of ABO-T1 using either ABO-RNA, ABO-ri-1, or ABO-ri-8; Individual data points shown (n = 2 independent experiments). Kinetic assays were performed using fixed concentrations of gRNA (80 nM) and Cas9 (40 nM) and measured at the indicated time points. **d** Graph showing cleavage activity resulting from a titration of Cas9 RNP complex loaded with either ABO-RNA, ABO-ri-1, or ABO-ri-8 versus the ABO-T1 target sequence; Individual data points shown (n = 2 independent experiments).

a

| Name     | crRNA Sequence (5'→3')   |
|----------|--------------------------|
| ABO-RNA  | CAUGGAGUCCGCGACCACG      |
| ABO-ri-1 | CAUGGAG[ ]UCCGCGACCAC[ ] |
| ABO-ri-8 | CAUGGAG[ ]UCCGCGACCA[ ]G |

b

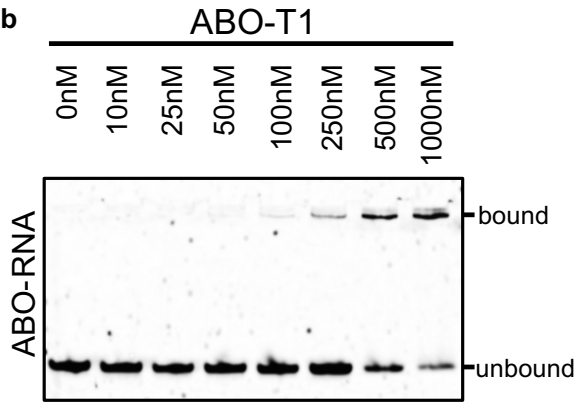

c

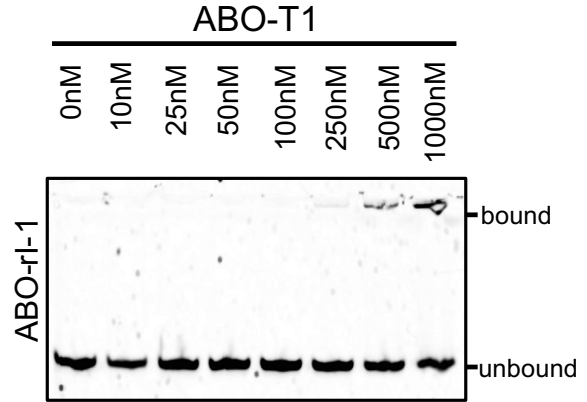

d

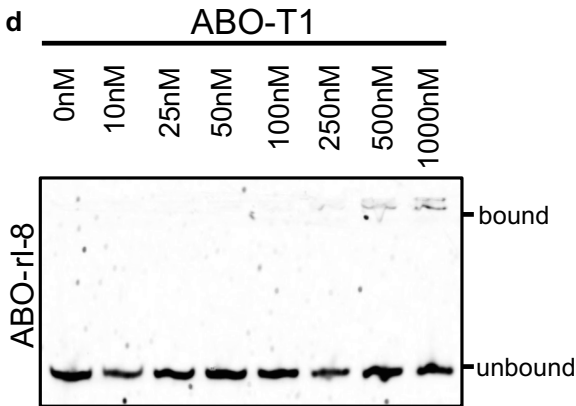

e

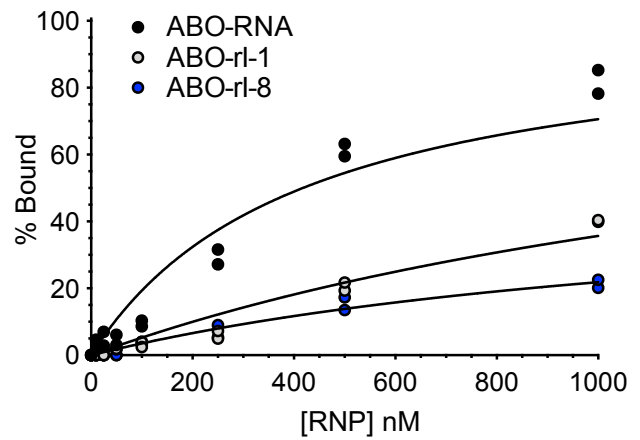

**Supplementary Figure 6. Effect of inosine modifications in crRNAs on the ability**

**of dCas9 to bind target DNA. a** List of inosine-modified crRNA sequences. Red [I]

indicates the position of ribose inosine modifications in the crRNA sequence.

Representative gels showing binding of nuclease-deficient Cas9 (dCas9) to ABO-T1

target DNA using **b** ABO-RNA, **c** ABO-ri-1 or **d** ABO-ri-8 crRNAs. The top band

represents the bound DNA substrate while the bottom band corresponds to the

unbound substrate. **e** Graph showing the DNA binding resulting from a titration of Cas9

RNP complex loaded with either ABO-RNA, ABO-ri-1, or ABO-ri-8 versus the ABO-T1

target sequence; Individual data points shown (n = 2 independent experiments). Binding

experiments were performed in duplicate with similar results.

| a Name          | crRNA Sequence (5'→3')                                                                     |
|-----------------|--------------------------------------------------------------------------------------------|
| <b>ABO-RNA</b>  | CAUGGAGUUCGCGACCACG                                                                        |
| <b>ABO-rl-1</b> | CAUGGAG[ <span style="color:red">U</span> ]UCCGCGACCAC[ <span style="color:red">U</span> ] |
| <b>ABO-rl-8</b> | CAUGGAG[ <span style="color:red">U</span> ]UCCGCGACCA[ <span style="color:red">U</span> ]G |

| Name          | DNA Sequence (5'→3')            |
|---------------|---------------------------------|
| <b>ABO-T1</b> | CATGGAGTTCGCGACCACG <u>TGG</u>  |
| <b>ABO-T5</b> | CATGGAGATCCGCGACCACATGG         |
| <b>ABO-T7</b> | CATGGAGATCCGCGACCA <u>TGTGG</u> |

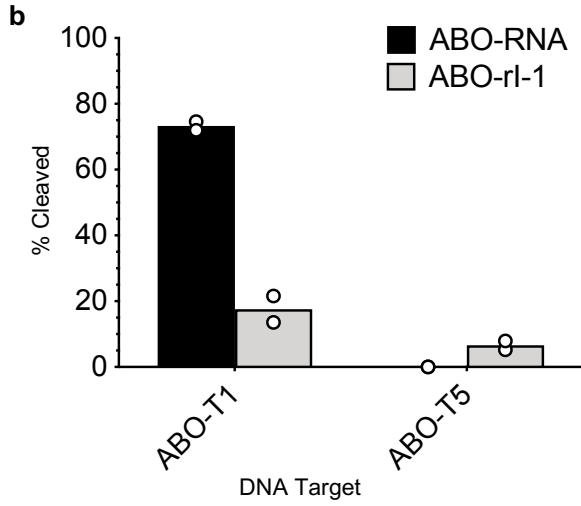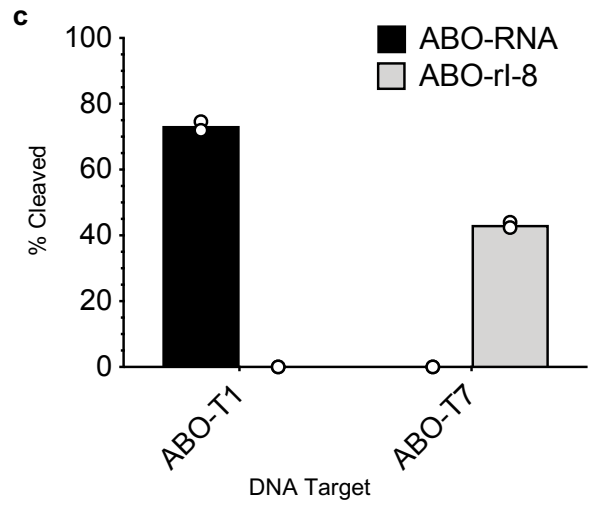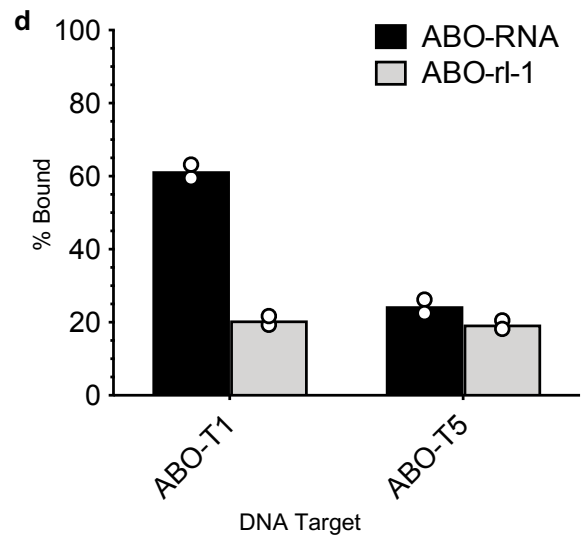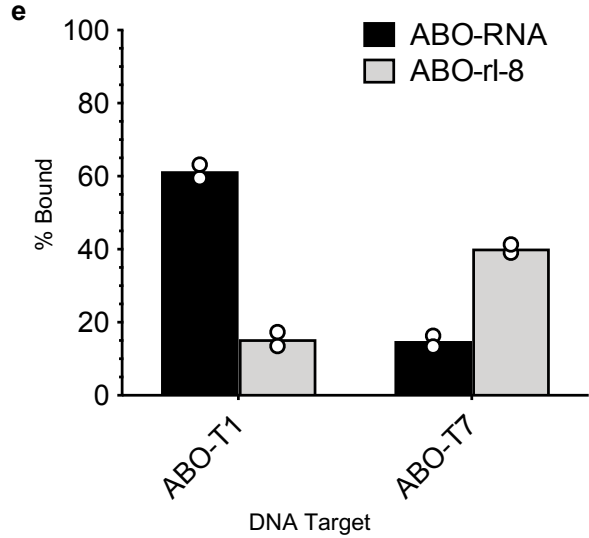

**Supplementary Figure 7. Relationship between cleavage activity and target**

**engagement of Cas9 using inosine-modified crRNAs. a** List of inosine-modified crRNA sequences and DNA target sequences. Red [I] indicates the position of ribose inosine modifications in the crRNA sequence. SNPs in DNA targets are indicated with red lettering. Bar graphs showing the relative amount of DNA cleavage resulting from *in vitro* reactions containing Cas9 with ABO-RNA or **b** ABO-ri-1 or **c** ABO-ri-8 versus the indicated target sequences; Mean with individual data points shown (n = 2 independent experiments). Bar graphs showing the relative amount of DNA binding resulting from *in vitro* reactions containing dCas9 with ABO-RNA or **d** ABO-ri-1 or **e** ABO-ri-8 versus the indicated target sequences; Mean with individual data points shown (n = 2 independent experiments). *In vitro* binding assays were performed using fixed concentrations of crRNA (750 nM) and Cas9 (500 nM). Quantification of cleavage percentages was performed using ImageJ.

**a**

| Name     | crRNA Sequence (5'→3')                                                                         |
|----------|------------------------------------------------------------------------------------------------|
| ABO-RNA  | CAUGGAGUCCGCGACCACG                                                                            |
| ABO-rl-1 | CAUGGAG[ <span style="color: red;">I</span> ]UCCGCGACCAC[ <span style="color: red;">I</span> ] |
| ABO-rl-8 | CAUGGAG[ <span style="color: red;">I</span> ]UCCGCGACCA[ <span style="color: red;">I</span> ]G |

**b**      **ABO-T1 Target:** 5'- CATGGAGTTCCGCGACCACGTGG -3'

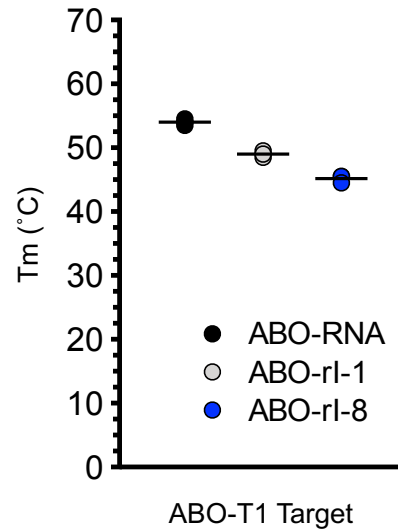

**Supplementary Figure 8. Effect of ribose inosine modifications on crRNA-DNA**

**target heteroduplex melting temperature. a** List of inosine-modified crRNA sequences. Red [I] indicates the position of ribose inosine modifications in the crRNA sequence. **b** Plot showing melting temperature for heteroduplexes comprised of single-stranded sequence corresponding to ABO-T1 DNA and an RNA oligonucleotide corresponding to the spacer portion of ABO-RNA, ABO-rl-1, or ABO-rl-8; Mean with individual data points shown (n = 3 independent experiments).

**a**

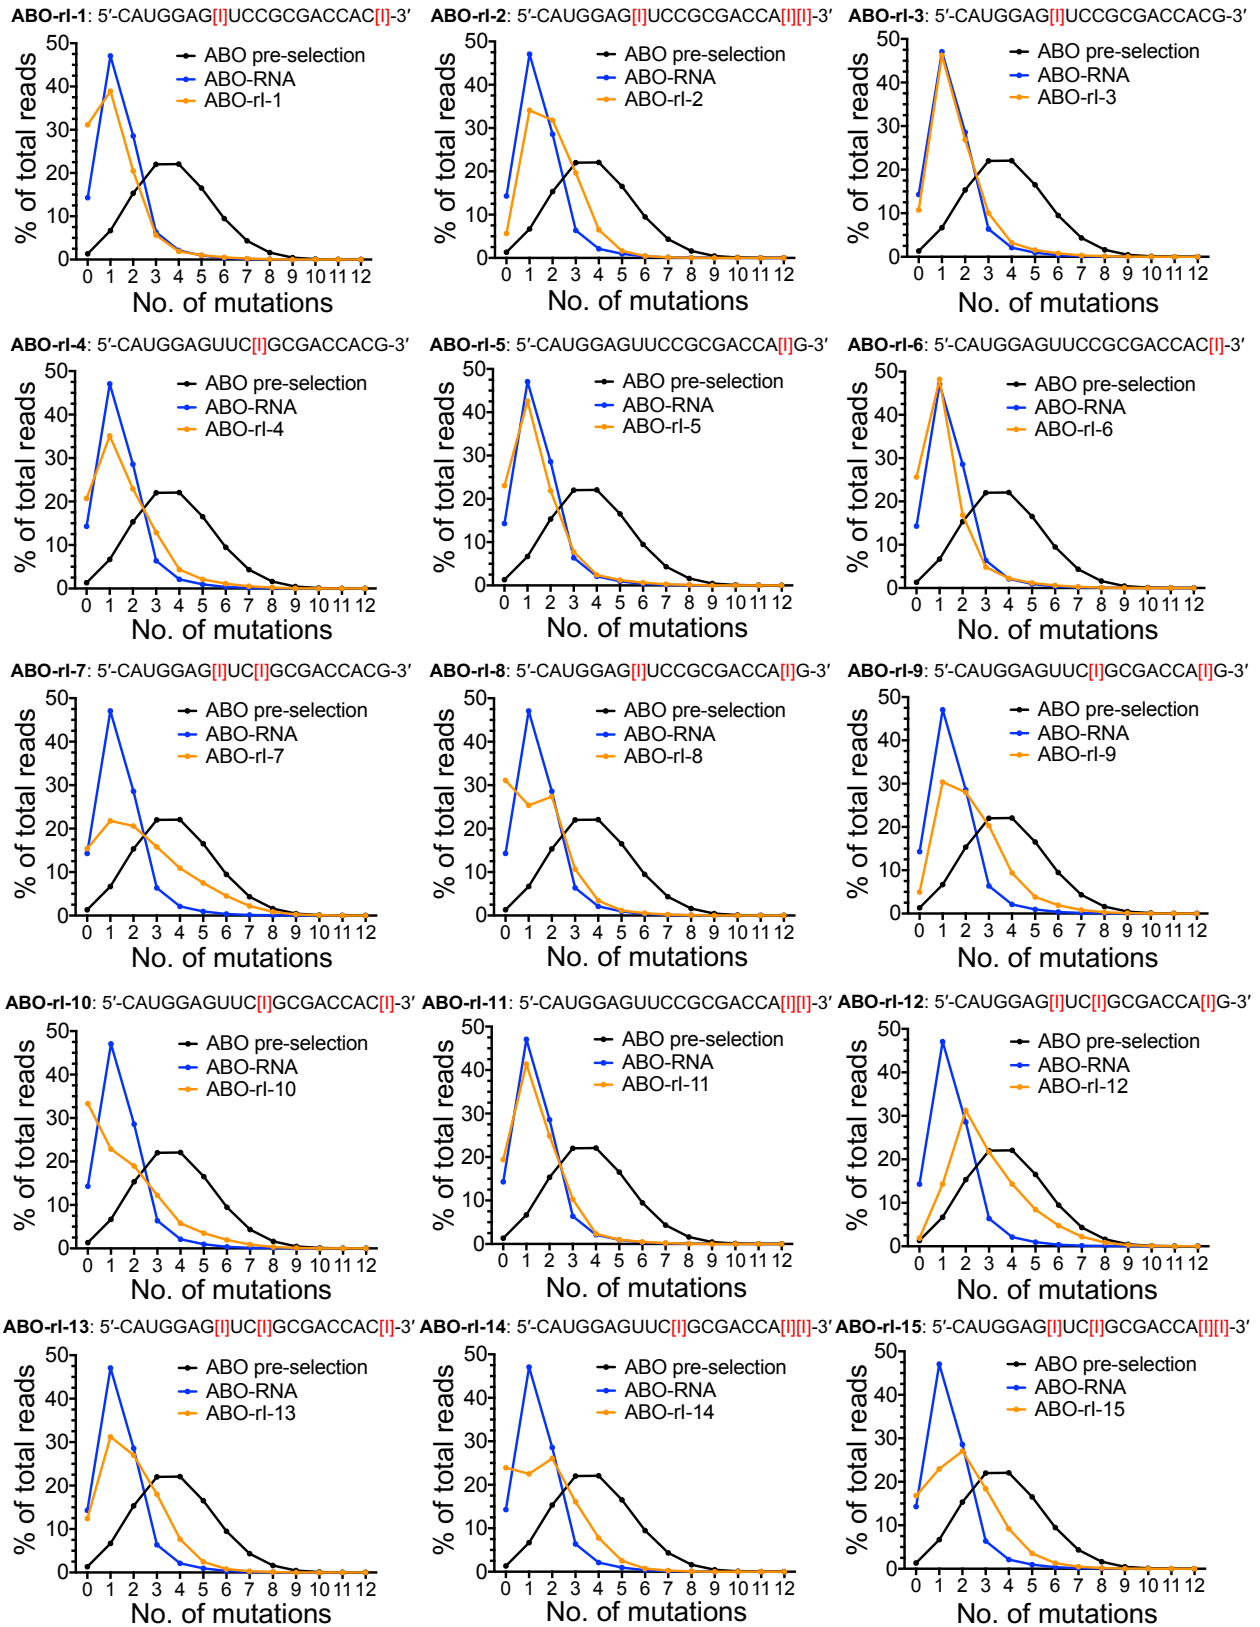



**Supplementary Figure 9. Distribution of mutations in pre- and post-selection**

**libraries for ABO-RNA and inosine-modified crRNAs. a** Graphs indicating the number of target sequence mutations in each pre- and post-selection library. ABO pre-selection (black) and ABO-RNA post-selection (blue) data are compared to the post-selection of crRNAs containing ribose inosine(s) (orange). A red [I] denotes the position of inosine modifications in the crRNA sequence. Mutations were counted for each position throughout the 20 bp target site.

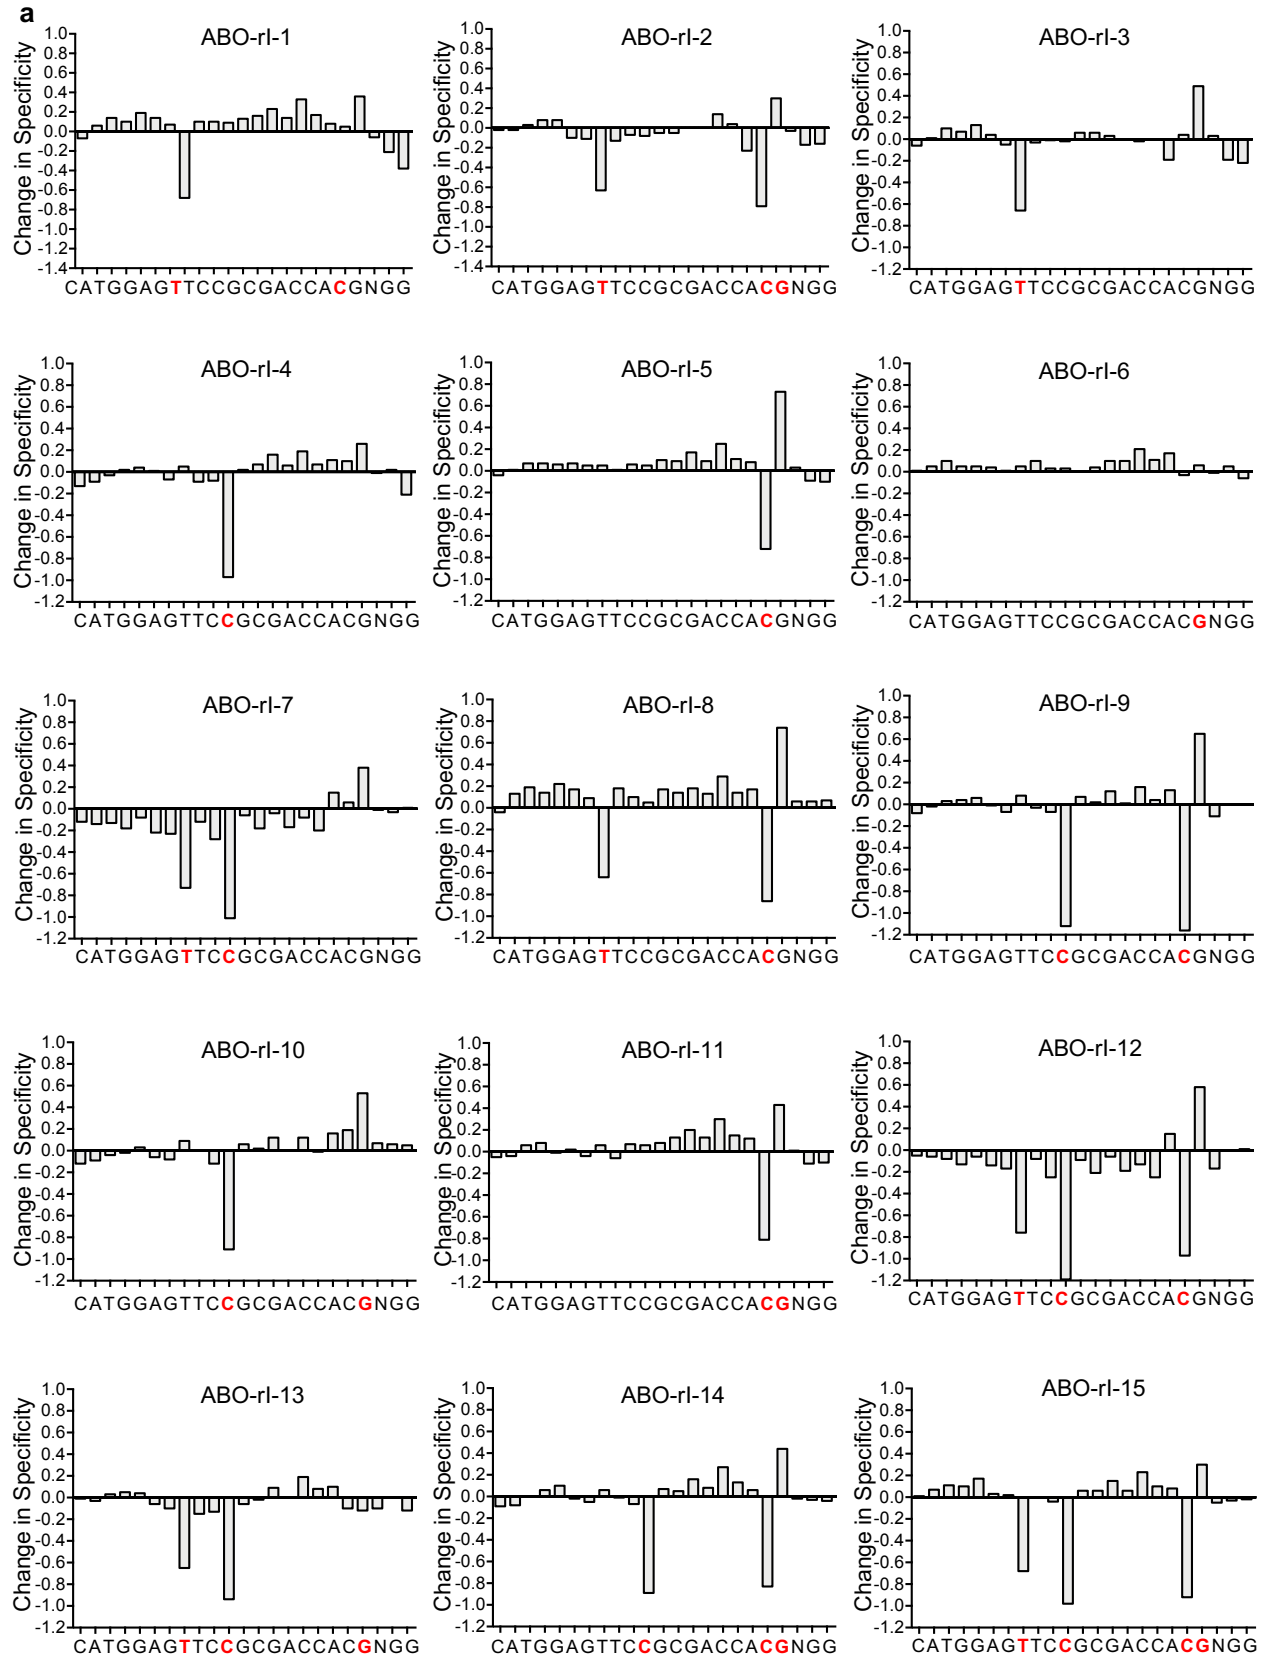

**Supplementary Figure 10. Change in specificity score of inosine-modified crRNAs compared to ABO-RNA.** a Bar graphs showing the quantitative difference in specificity score at each position in the DNA target site for inosine-modified crRNAs. SNP locations in the 20 base-pair DNA target are indicated with red lettering. The PAM is shown as “NGG” on the 3’ end of the target. A score of zero indicates no change in specificity. The difference in specificity was calculated as the specificity score(modified)–specificity score(ABO-RNA). The specificity scoring of each nucleotide position is relative to the pre-selection control library data.

| Name     | crRNA Sequence (5'→3')     | Name      | crRNA Sequence (5'→3')       |
|----------|----------------------------|-----------|------------------------------|
| ABO-RNA  | CAUGGAGUCCGCGACCACG        | ABO-ri-8  | CAUGGAG[U]CCGCGACCA[U]G      |
| ABO-ri-1 | CAUGGAG[U]UCCGCGACCAC[U]   | ABO-ri-9  | CAUGGAGUUC[U]GCGACCA[U]G     |
| ABO-ri-2 | CAUGGAG[U]UCCGCGACCA[U][U] | ABO-ri-10 | CAUGGAGUUC[U]GCGACCAC[U]     |
| ABO-ri-3 | CAUGGAG[U]UCCGCGACCACG     | ABO-ri-11 | CAUGGAGUCCGCGACCA[U][U]      |
| ABO-ri-4 | CAUGGAGUUC[U]GCGACCACG     | ABO-ri-12 | CAUGGAG[U]UC[U]GCGACCA[U]G   |
| ABO-ri-5 | CAUGGAGUCCGCGACCA[U]G      | ABO-ri-13 | CAUGGAG[U]UC[U]GCGACCAC[U]   |
| ABO-ri-6 | CAUGGAGUCCGCGACCAC[U]      | ABO-ri-14 | CAUGGAGUUC[U]GCGACCA[U][U]   |
| ABO-ri-7 | CAUGGAG[U]UC[U]GCGACCACG   | ABO-ri-15 | CAUGGAG[U]UC[U]GCGACCA[U][U] |

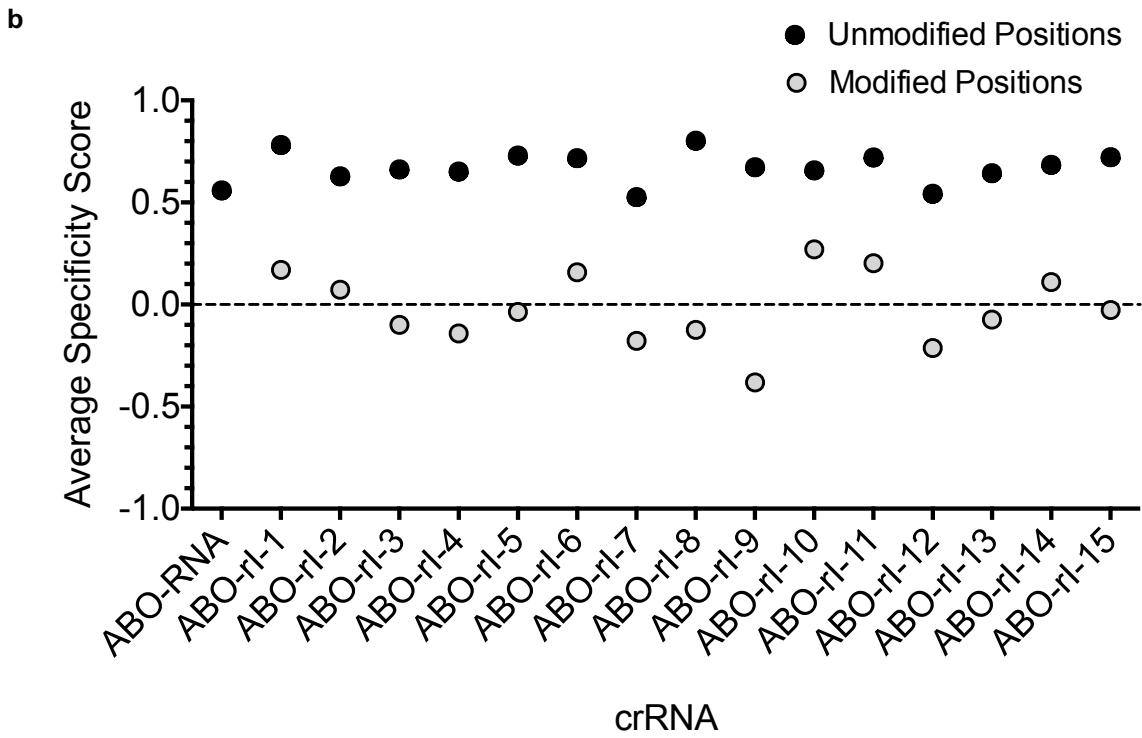

**Supplementary Figure 11. Average specificity score of ribose inosine modified positions in the *ABO* crRNAs.** **a** List of inosine-modified crRNA sequences. Red [I] indicates the position of ribose inosine modifications in the crRNA sequence. **b** Graph showing the average specificity score for all non-modified positions vs. all modified positions for the indicated crRNAs. This value was calculated by averaging the specificity scores at each nucleotide position as visualized with heat maps in **Figure 2**. Specificity scores of 1.0 correspond to 100% enrichment for, while scores of -1.0 correspond to 100% enrichment against a base-pair at a specific position. These scores were averaged for all unmodified positions:  $(\text{sum of specificity scores for each unmodified position in the crRNA}) / (\# \text{ of unmodified positions in the crRNA}) = \text{average unmodified specificity score (black)}$ . The average of all the modified positions was also calculated:  $(\text{sum of specificity scores for each modified position in the crRNA}) / (\# \text{ of modified positions in the crRNA}) = \text{average modified specificity score (grey)}$ . The dotted horizontal line represents an average crRNA specificity score of 0.

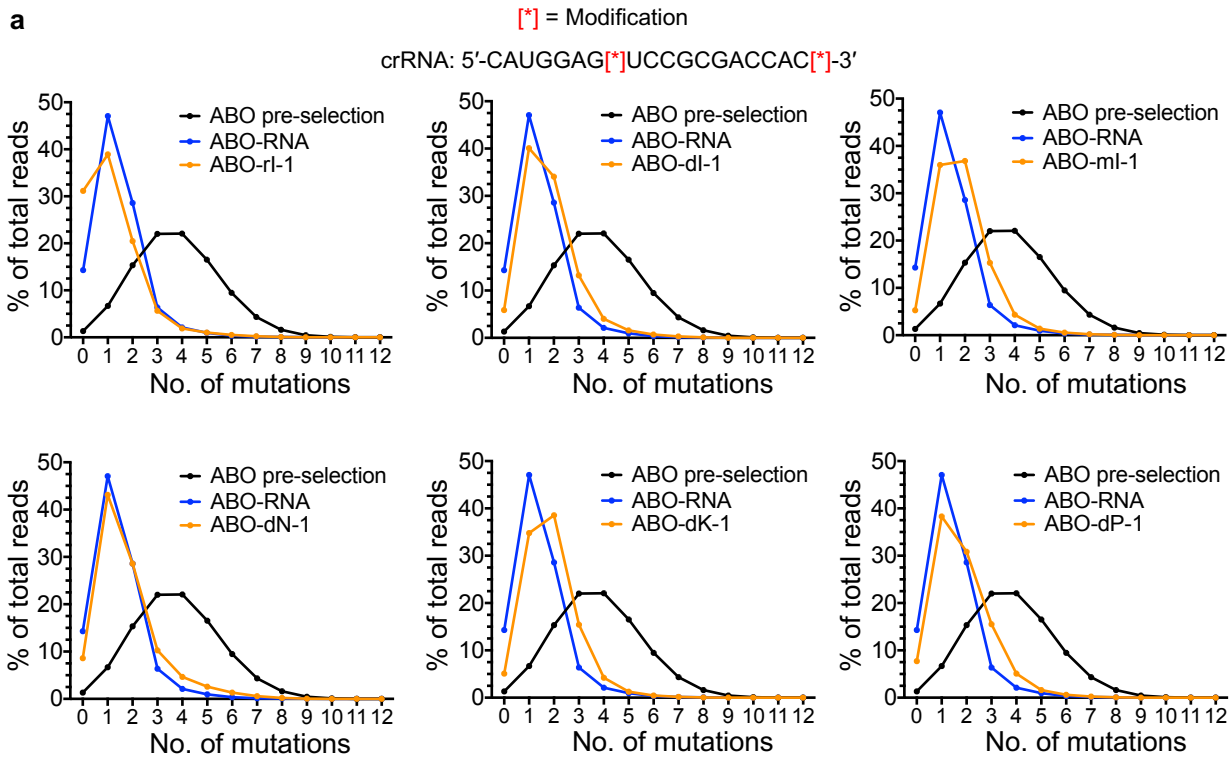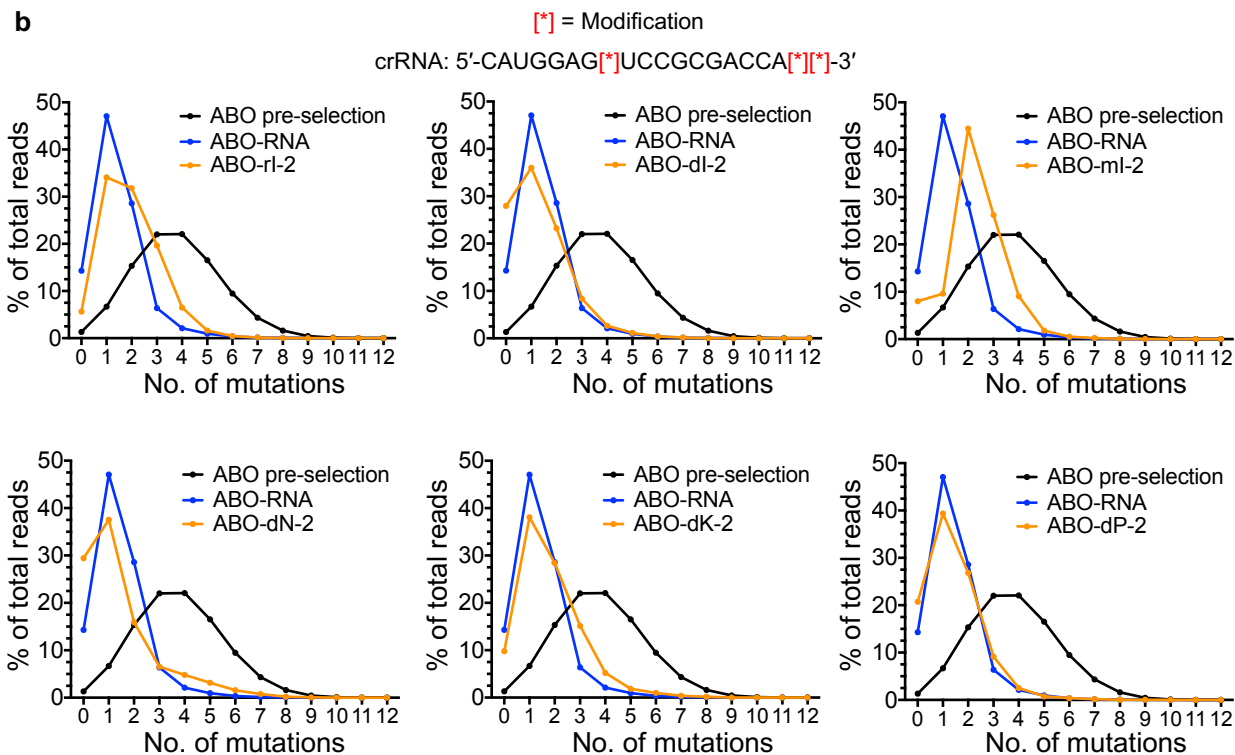

**Supplementary Figure 12. Distribution of mutations in pre- and post-selection libraries for ABO-RNA and universal base-modified crRNAs.** Graphs indicating the number of target sequence mutations in each pre- and post-selection library using crRNAs modified with universal bases at **a** two or **b** three positions, as indicated. ABO pre-selection (black) and ABO-RNA post-selection (blue) data are compared to the post-selection of crRNAs containing the indicated universal base(s) (orange). A red [\*] denotes the position of the universal base modification in the crRNA sequence. Mutations were counted for each position throughout the 20 bp target site.

| a | Target | DNA Sequence (5'→3')             | Allele Frequency (%) |
|---|--------|----------------------------------|----------------------|
|   | ABO-T1 | CATGGAGTTCGCGACCACG <u>TGG</u>   | 54.21                |
|   | ABO-T2 | CATGGAGATCCGCGACCACG <u>TGG</u>  | 25.50                |
|   | ABO-T3 | CATGGAGTTCGCGACCATG <u>TGG</u>   | 15.98                |
|   | ABO-T4 | CATGGAGTTCGCGACCACAT <u>TGG</u>  | 0.015                |
|   | ABO-T5 | CATGGAGATCCGCGACCACAT <u>TGG</u> | 0.0038               |
|   | ABO-T6 | CATGGAGATCCGCGACCATAT <u>TGG</u> | 0.00061              |
|   | ABO-T7 | CATGGAGATCCGCGACCATAT <u>TGG</u> | 4.08                 |
|   | ABO-T8 | CATGGAGTTCGCGACCATAT <u>TGG</u>  | 0.0024               |

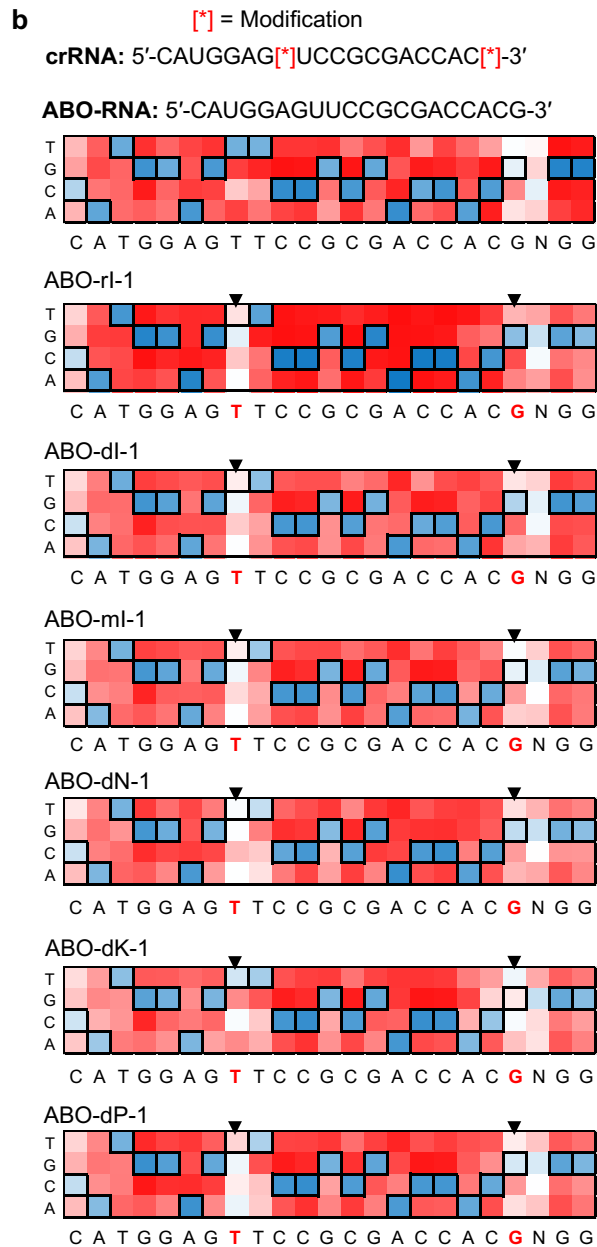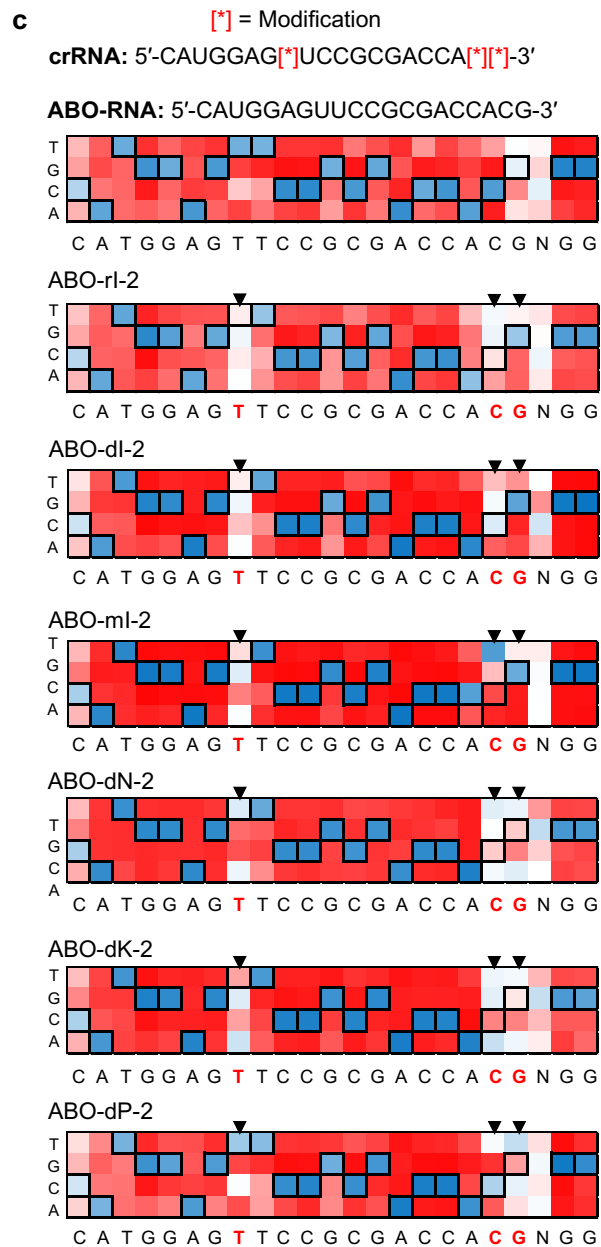



**Supplementary Figure 13. *In vitro* specificity profiles for *ABO* crRNAs containing**

**various universal base modifications. a** List of DNA targets corresponding to sequences in the *ABO* gene based on clinical polymorphism data. SNPs are indicated with red lettering. The PAM sequence is underlined. Allele frequency indicates either the current tallied allele frequency or the statistically predicted frequency (for sequences containing multiple SNPs). Heat maps corresponding to the specificity profiles of crRNAs modified with universal bases at **b** two or **c** three positions, as indicated. The positions of universal bases are indicated by black arrows. Specificity scores of 1.0 (dark blue) correspond to 100% enrichment for, while scores of -1.0 (dark red) correspond to 100% enrichment against a base-pair at a specific position. Black boxes denote the intended target nucleotide.

**a**

[\*] = Modification

crRNA: 5'-CAUGGAG[\*]UCCGCGACCAC[\*]-3'

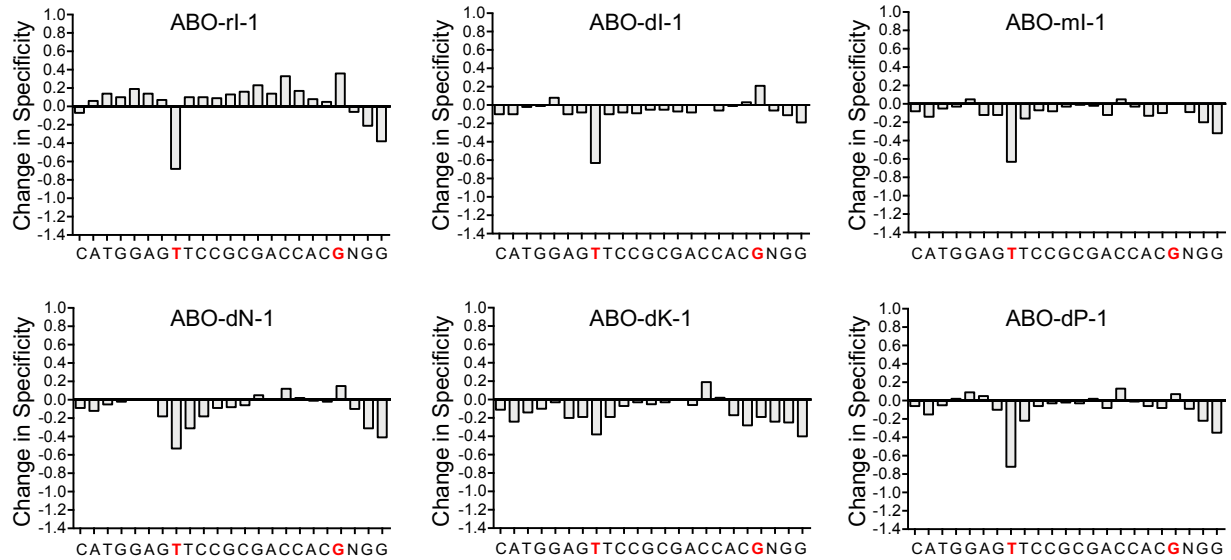**b**

[\*] = Modification

crRNA: 5'-CAUGGAG[\*]UCCGCGACCA[\*]\*-3'

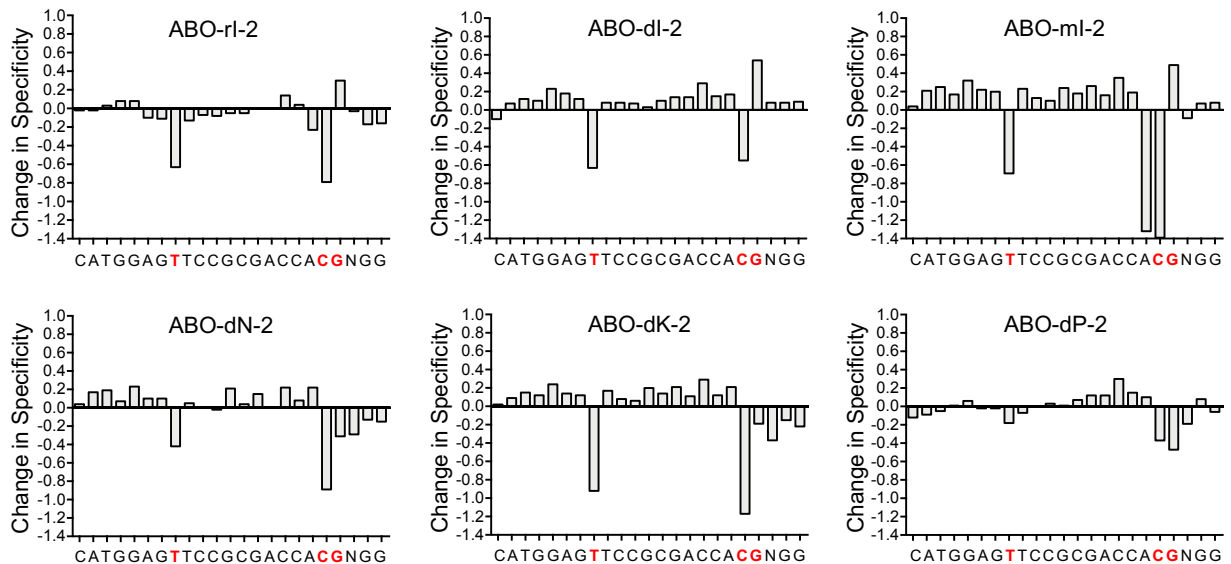

**Supplementary Figure 14. Change in specificity score of universal base-modified crRNAs compared to ABO-RNA.** Bar graphs showing the quantitative difference in specificity score at each position in the DNA target site for crRNAs modified with universal bases at **a** two or **b** three positions, as indicated. SNP locations in the 20 bp DNA target are indicated with red lettering. The PAM is shown as “NGG” on the 3’ end of the target. A score of zero indicates no change in specificity. The difference in specificity was calculated as the specificity score(modified)–specificity score(ABO-RNA). The specificity scoring of each nucleotide position is relative to the pre-selection control library data.

a

| Name      | crRNA Sequence (5'→3')     |
|-----------|----------------------------|
| ABO-RNA   | CAUGGAGUCCGCGACCACG        |
| ABO-[X]-1 | CAUGGAG[*]UCCGCGACCAC[*]   |
| ABO-[X]-2 | CAUGGAG[*]UCCGCGACCA[*][*] |

b

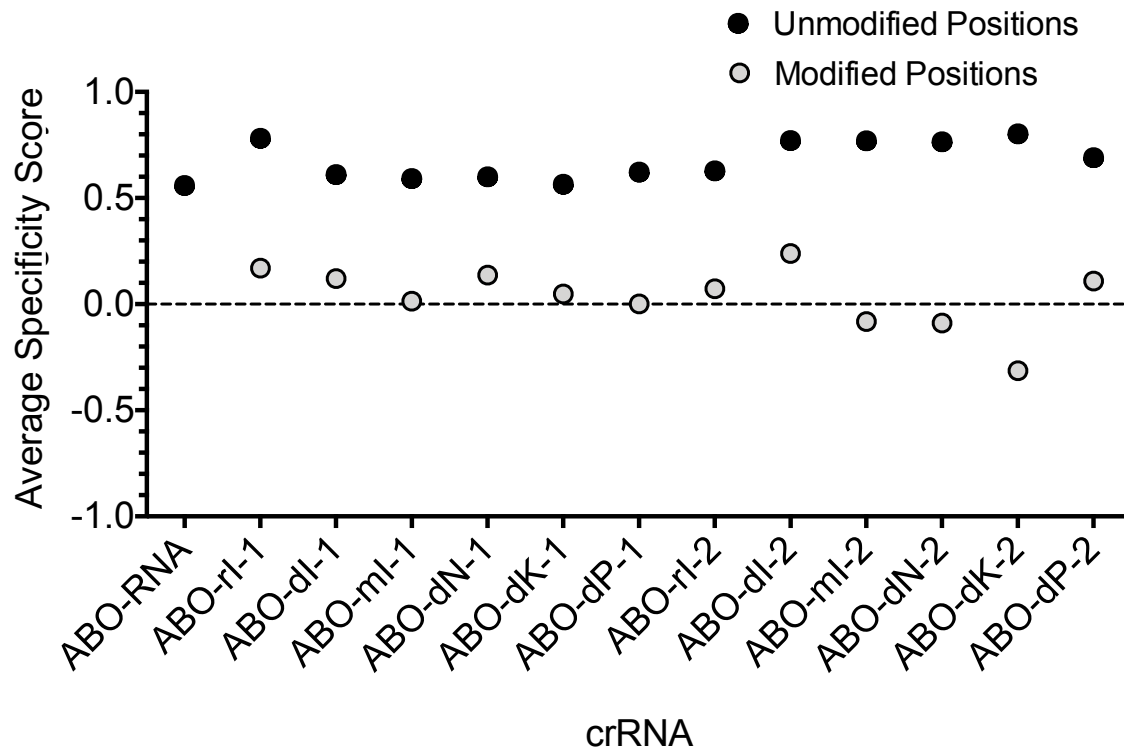

**Supplementary Figure 15. Average specificity score of universal base modified positions in the *ABO* crRNAs.** **a** List of universal base-modified crRNA sequences. Red [!] indicates the position of the universal base modifications in the crRNA sequence. **b** Graph showing the average specificity score for all non-modified positions vs. all modified positions for the indicated crRNAs. This value was calculated by averaging the specificity scores at each nucleotide position as visualized with heat maps in **Supplementary Figure 13**. Specificity scores of 1.0 correspond to 100% enrichment for, while scores of -1.0 correspond to 100% enrichment against a base-pair at a specific position. These scores were averaged for all unmodified positions:  $(\text{sum of specificity scores for each unmodified position in the crRNA}) / (\text{\# of unmodified positions in the crRNA}) = \text{average unmodified specificity score (black)}$ . The average of all the modified positions was also calculated:  $(\text{sum of specificity scores for each modified position in the crRNA}) / (\text{\# of modified positions in the crRNA}) = \text{average modified specificity score (grey)}$ . The dotted horizontal line represents an average crRNA specificity score of 0.

**a** HLA-ri-1: 5'-[ ]ACACAGAUCUACAAGGCC-3'

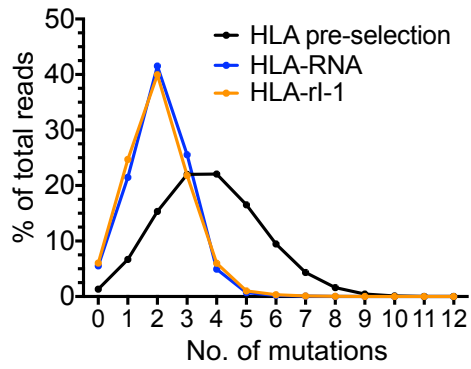

HLA-ri-2: 5'-CACACAGAUCU[ ]CAAGGCC-3'

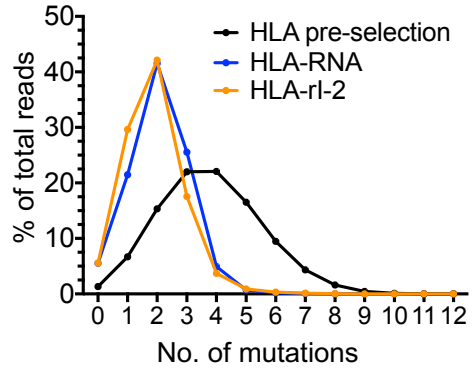

HLA-ri-3: 5'-CACACAGAUCUACAAGGCC[ ]-3'

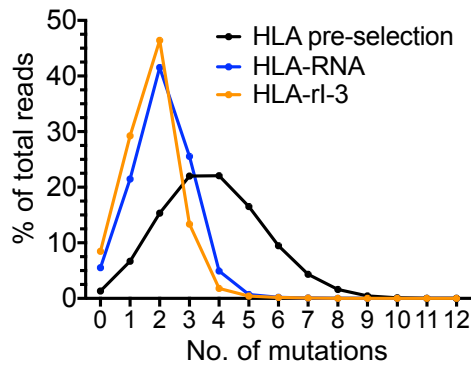

HLA-ri-4: 5'-CACACAGAUCU[ ]CAAGGCC[ ]-3'

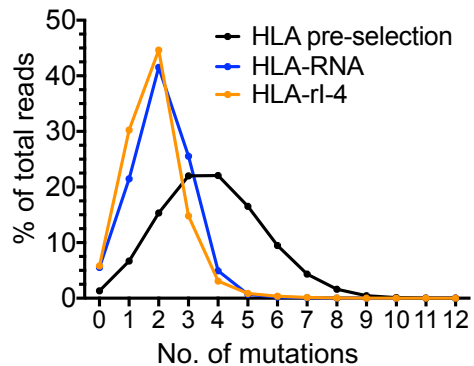

HLA-ri-5: 5'-[ ]ACACAGAUCUACAAGGCC[ ]-3'

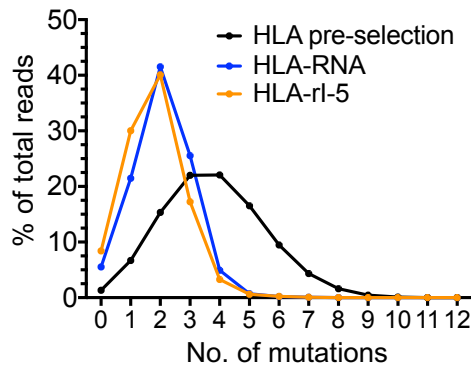

HLA-ri-6: 5'-[ ]ACACAGAUCU[ ]CAAGGCC-3'

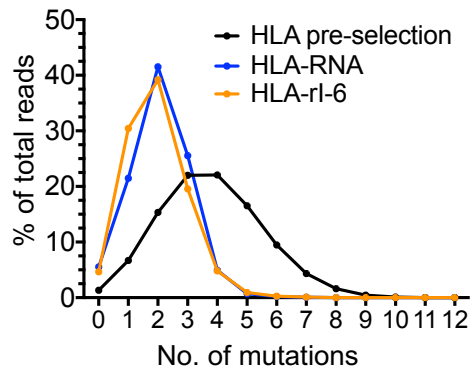

HLA-ri-7: 5'-[ ]ACACAGAUCU[ ]CAAGGCC[ ]-3'

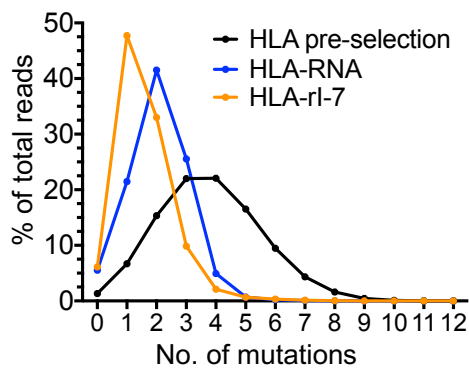

**Supplementary Figure 16. Distribution of mutations in pre- and post-selection libraries for HLA-RNA and inosine-modified crRNAs.** **a** Graphs indicating the number of target sequence mutations in each pre- and post-selection library. HLA pre-selection (black) and HLA-RNA post-selection (blue) data are compared to the post-selection of crRNAs containing ribose inosine(s) (orange). Red [I] denotes the position of inosine modifications in the crRNA sequence. Mutations were counted for each position throughout the 20 bp target site.

| a | Target | DNA Sequence (5'→3')                               | Allele Frequency (%) |
|---|--------|----------------------------------------------------|----------------------|
|   | HLA-T1 | CACACAGATCTACAAGGCC <u>AGG</u>                     | 0.50                 |
|   | HLA-T2 | <b>G</b> CACACAGATCTACAAGGCC <u>AGG</u>            | 45.49                |
|   | HLA-T3 | CACACAGATCT <b>C</b> CAAGGCC <u>AGG</u>            | 36.70                |
|   | HLA-T4 | CACACAGATCTACAAGGCC <b>A</b> AGG                   | 74.20                |
|   | HLA-T5 | CACACAGATCT <b>C</b> CAAGGCC <b>A</b> AGG          | 27.23                |
|   | HLA-T6 | <b>G</b> CACACAGATCTACAAGGCC <b>A</b> AGG          | 33.75                |
|   | HLA-T7 | <b>G</b> CACACAGATCT <b>C</b> CAAGGCC <u>AGG</u>   | 16.69                |
|   | HLA-T8 | <b>G</b> CACACAGATCT <b>C</b> CAAGGCC <b>A</b> AGG | 12.39                |

b

HLA-RNA: 5'-CACACAGAUCUACAAGGCC-3'

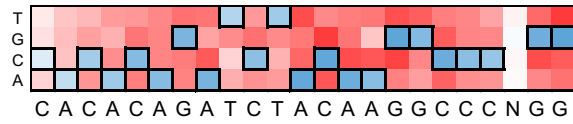

HLA-ri-4: 5'-CACACAGAUCU[ ]CAAGGCC[ ]-3'

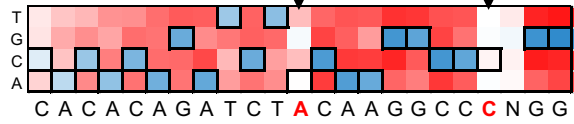

HLA-ri-1: 5'-[ ]ACACAGAUCUACAAGGCC-3'

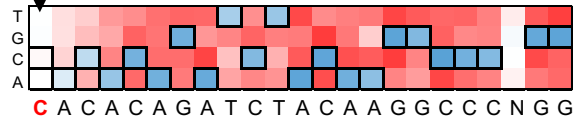

HLA-ri-5: 5'-[ ]ACACAGAUCUACAAGGCC[ ]-3'

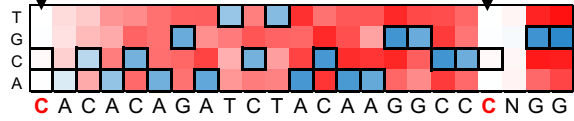

HLA-ri-2: 5'-CACACAGAUCU[ ]CAAGGCC-3'

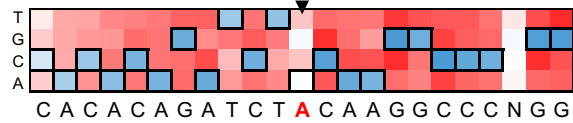

HLA-ri-6: 5'-[ ]ACACAGAUCU[ ]CAAGGCC-3'

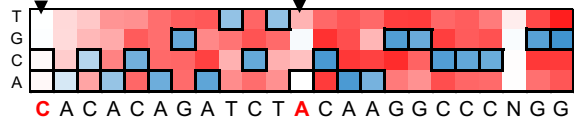

HLA-ri-3: 5'-CACACAGAUCUACAAGGCC[ ]-3'

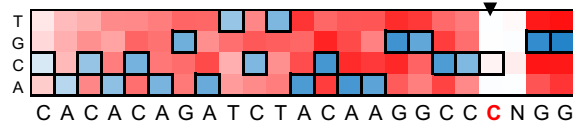

HLA-ri-7: 5'-[ ]ACACAGAUCU[ ]CAAGGCC[ ]-3'

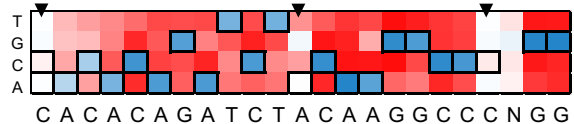



**Supplementary Figure 17. *In vitro* specificity profiles for *HLA* crRNAs containing inosine base modifications.** **a** List of DNA targets corresponding to sequences in the *HLA* gene based on clinical polymorphism data. SNPs are indicated with red lettering. The PAM sequence is underlined. Allele frequency indicates either the current tallied allele frequency or the statistically predicted frequency (for sequences containing multiple SNPs). **b** Heat maps corresponding to the specificity profiles of crRNAs modified with inosine bases at the indicated positions. The positions of inosine bases are indicated by black arrows. Specificity scores of 1.0 (dark blue) correspond to 100% enrichment for, while scores of -1.0 (dark red) correspond to 100% enrichment against a base-pair at a specific position. Black boxes denote the intended target nucleotide.

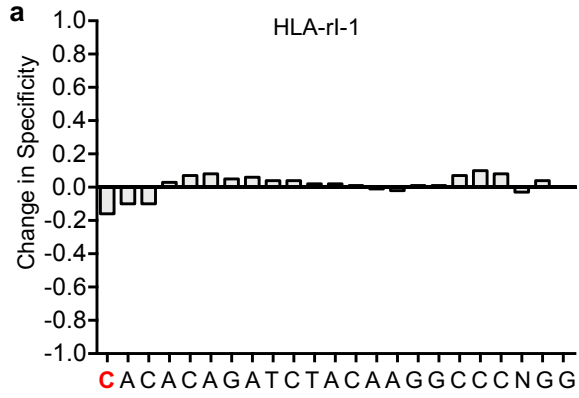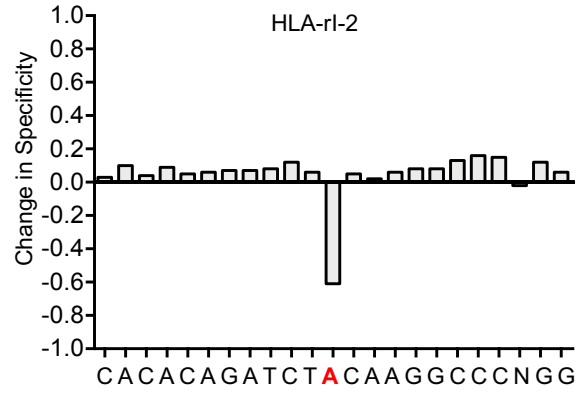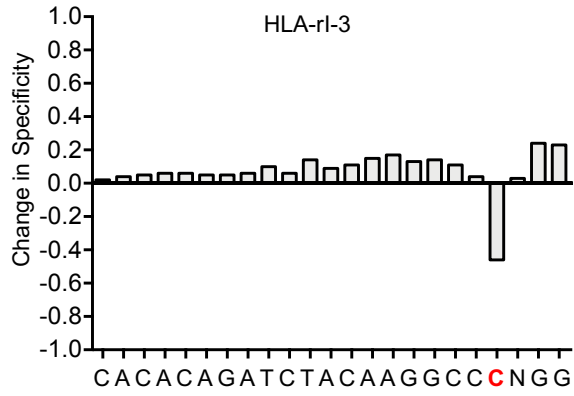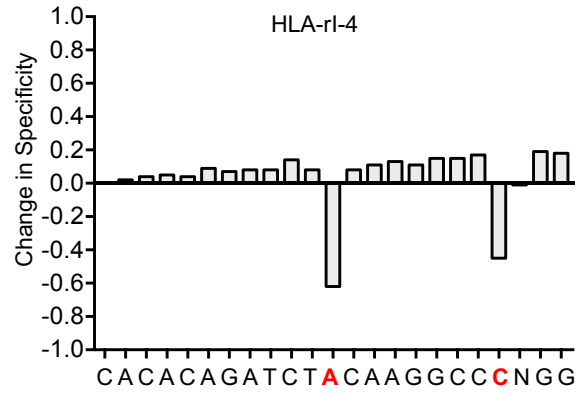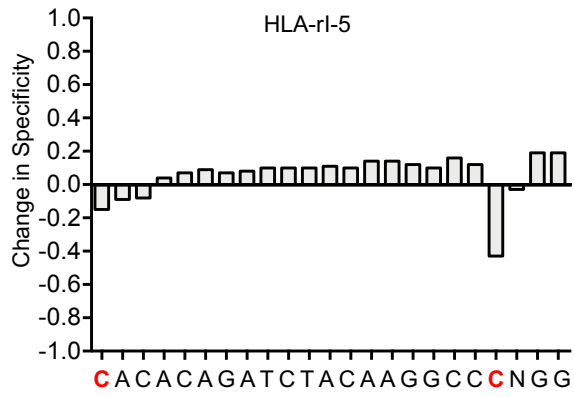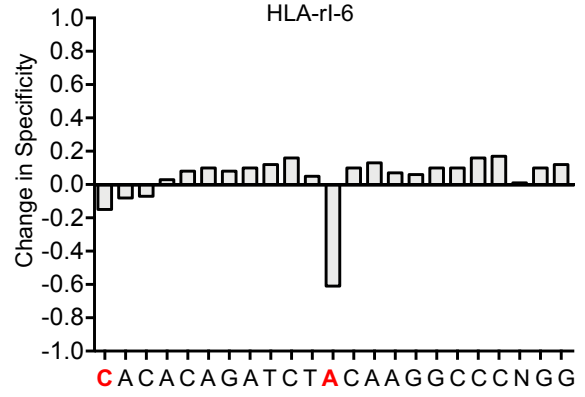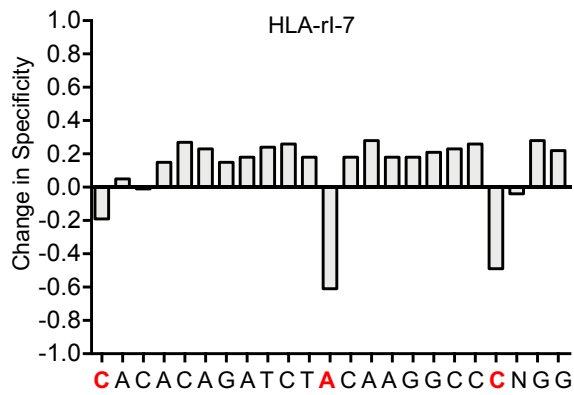

**Supplementary Figure 18. Change in specificity score of inosine-modified crRNAs compared to HLA-RNA. a** Bar graphs showing the quantitative difference in specificity score at each position in the DNA target site for crRNAs modified with inosine bases as indicated. SNP locations in the 20 base-pair DNA target are indicated with red lettering. The PAM is shown as “NGG” on the 3’ end of the target. A score of zero indicates no change in specificity. The difference in specificity was calculated as the specificity score(modified)–specificity score(HLA-RNA). The specificity scoring of each nucleotide position is relative to the pre-selection control library data.

a

| Name     | crRNA Sequence (5'→3')     |
|----------|----------------------------|
| HLA-RNA  | CACACAGAUCUACAAGGCC        |
| HLA-ri-1 | [1]ACACAGAUCUACAAGGCC      |
| HLA-ri-2 | CACACAGAUCU[1]CAAGGCC      |
| HLA-ri-3 | CACACAGAUCUACAAGGCC[1]     |
| HLA-ri-4 | CACACAGAUCU[1]CAAGGCC[1]   |
| HLA-ri-5 | [1]ACACAGAUCUACAAGGCC[1]   |
| HLA-ri-6 | [1]ACACAGAUCU[1]CAAGGCC    |
| HLA-ri-7 | [1]ACACAGAUCU[1]CAAGGCC[1] |

b

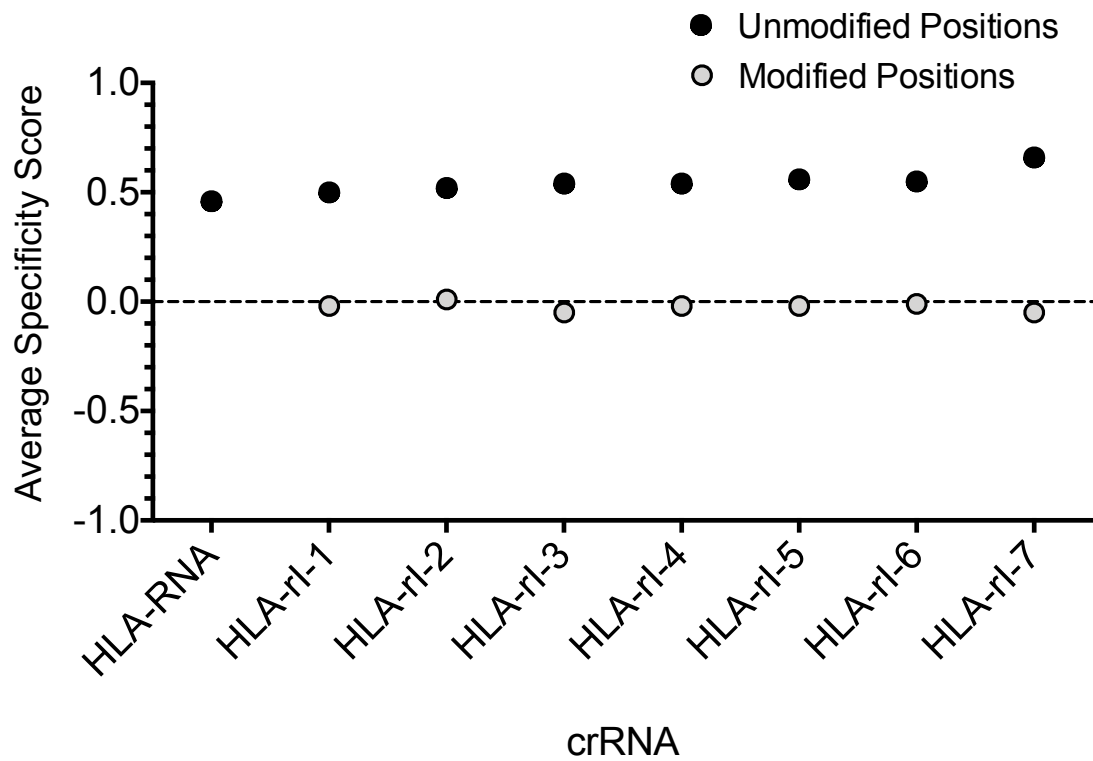

**Supplementary Figure 19. Average specificity score of ribose inosine modified positions in the *HLA* crRNAs.** **a** List of inosine-modified crRNA sequences. Red [I] indicates the position of ribose inosine modifications in the crRNA sequence. **b** Graph showing the average specificity score for all non-modified positions vs. all modified positions for the indicated crRNAs. This value was calculated by averaging the specificity scores at each nucleotide position as visualized with heat maps in

**Supplementary Figure 17.** Specificity scores of 1.0 correspond to 100% enrichment for, while scores of -1.0 correspond to 100% enrichment against a base-pair at a specific position. These scores were averaged for all unmodified positions:  $(\text{sum of specificity scores for each unmodified position in the crRNA}) / (\# \text{ of unmodified positions in the crRNA}) = \text{average unmodified specificity score (black)}$ . The average of all the modified positions was also calculated:  $(\text{sum of specificity scores for each modified position in the crRNA}) / (\# \text{ of modified positions in the crRNA}) = \text{average modified specificity score (grey)}$ . The dotted horizontal line represents an average crRNA specificity score of 0.

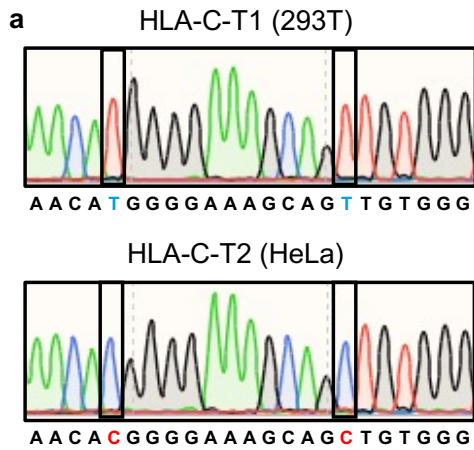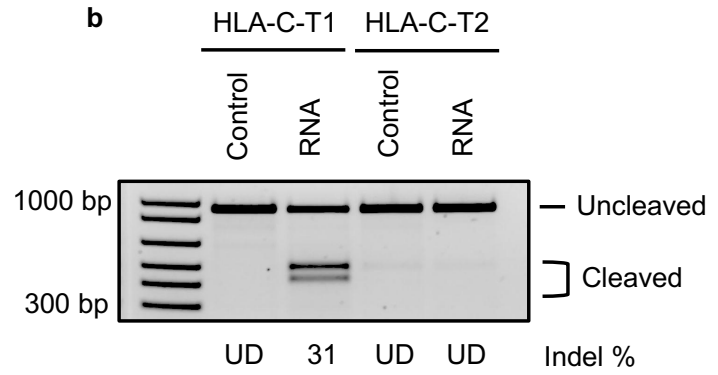

**c**

| Name      | crRNA Sequence (5'→3')     |
|-----------|----------------------------|
| HLA-C-RNA | AACAUGGGGAAAGCAGUUGU       |
| HLA-C-ri  | AACA[ri]GGGGAAAGCAG[ri]UGU |
| HLA-C-dI  | AACA[dI]GGGGAAAGCAG[dI]UGU |
| HLA-C-dP  | AACA[dP]GGGGAAAGCAG[dP]UGU |

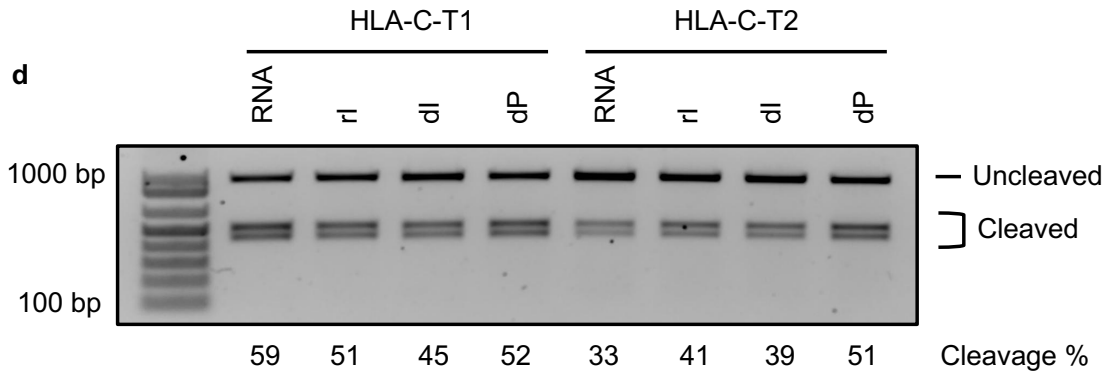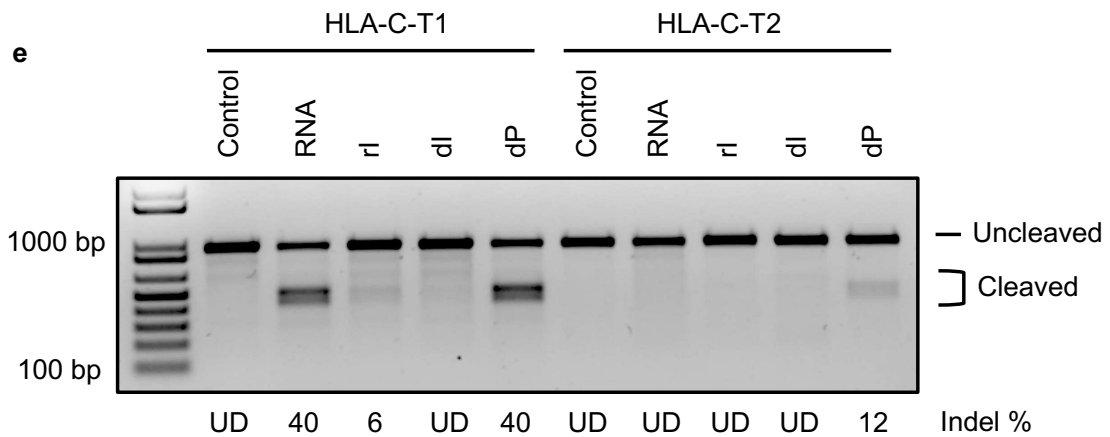

**Supplementary Figure 20. Cas9 cleavage activity using HLA-C-RNA and universal base-modified crRNAs *in vitro* and on the endogenous *HLA-C* locus in 293T and HeLa cells.** **a** Sanger sequencing trace of endogenous SNPs present within the *HLA-C* locus of 293T and HeLa cells. **b** Gel showing the cellular Cas9 cleavage efficiencies of HLA-C-T1 or HLA-C-T2 sequences using an unmodified HLA-C-RNA crRNA as determined by T7 endonuclease I digestion. Controls were harvested from cells stably expressing Cas9 that were not transfected with a guide RNA. **c** List of universal base-modified crRNA sequences. Red [X] indicates the position of the modified base within the crRNA sequence. **d** Gel showing the relative *in vitro* cleavage efficiencies of Cas9 RNPs complexed with HLA-C-RNA or universal base-modified crRNAs against the HLA-C-T1 or HLA-C-T2 DNA targets. **e** Gel showing the relative cellular cleavage efficiencies of Cas9 against HLA-C-T1 or HLA-C-T2 when complexed with HLA-C-RNA or universal base-modified crRNAs as determined by T7 endonuclease I digestion. Controls were harvested from cells stably expressing Cas9 that were not transfected with a guide RNA. UD denotes undetectable. Both *in vitro* and cellular cleavage assays of HLA-C-T1/T2 were performed in duplicate with similar results.

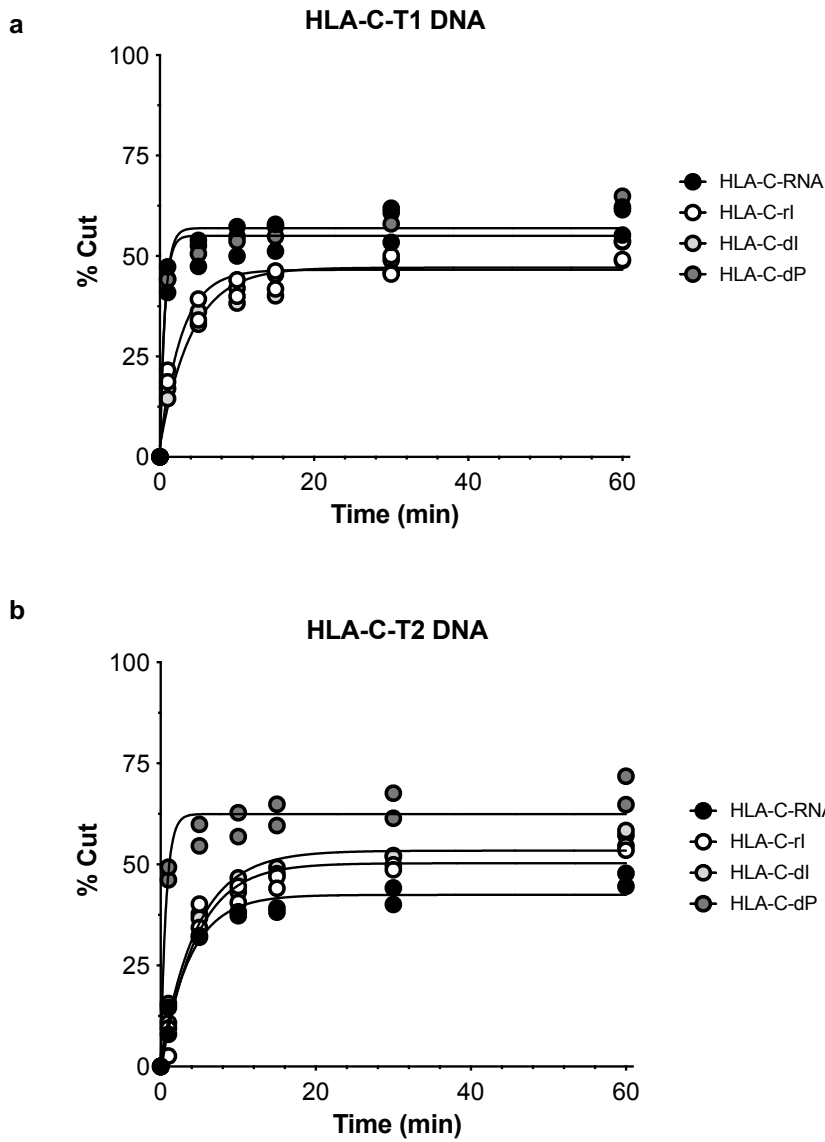

**Supplementary Figure 21. *In vitro* Cas9 cleavage kinetics using HLA-C-RNA or universal base-modified crRNAs.** Time course showing *in vitro* cleavage activity of Cas9 on **a** HLA-C-T1 or **b** HLA-C-T2 DNA targets using HLA-C-RNA or the indicated universal base-modified crRNAs. Experiments were performed with a concentration of 10 nM Cas9, 20 nM gRNA and 5 nM DNA target; Individual data points shown (n = 2 independent experiments).



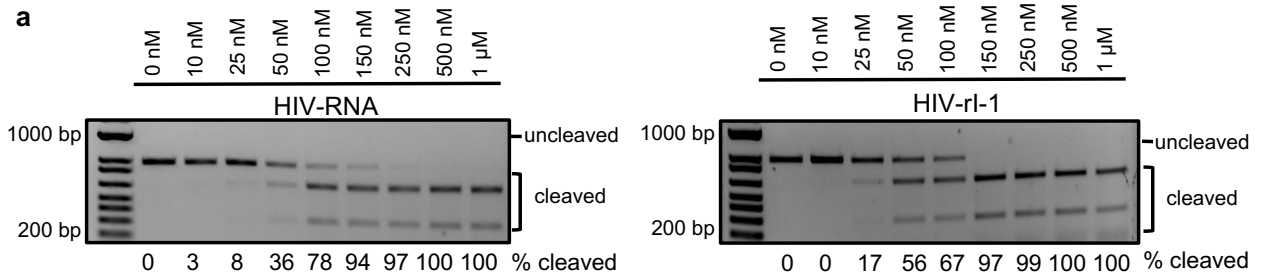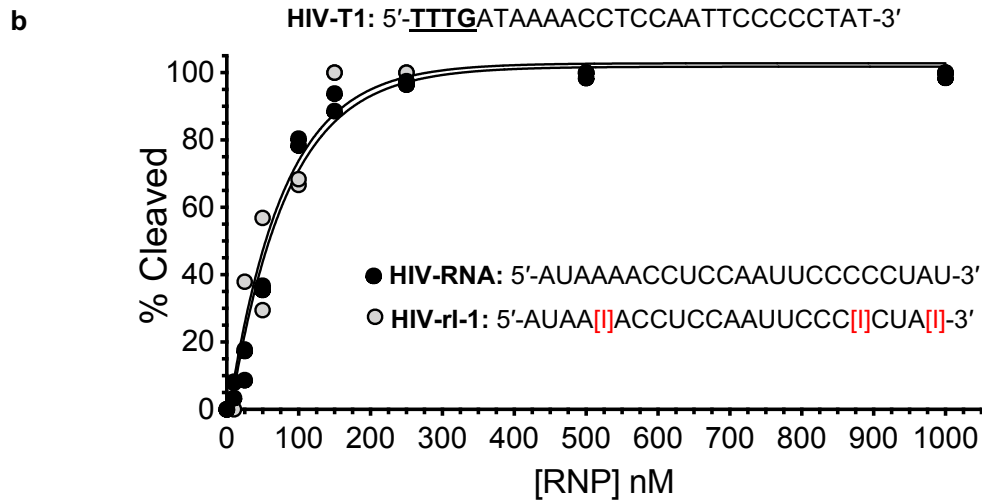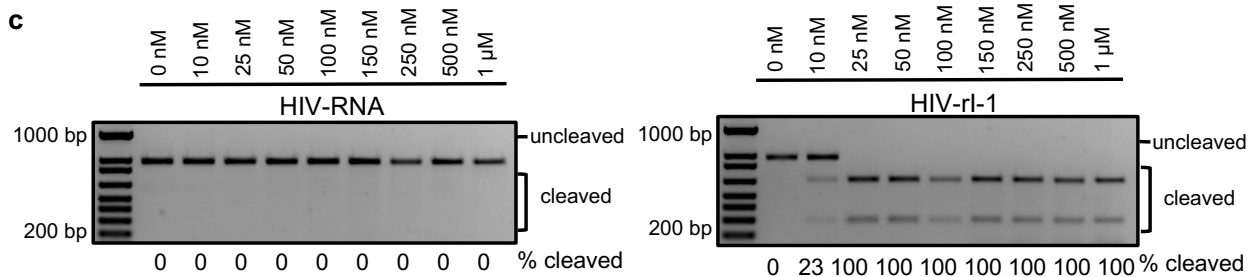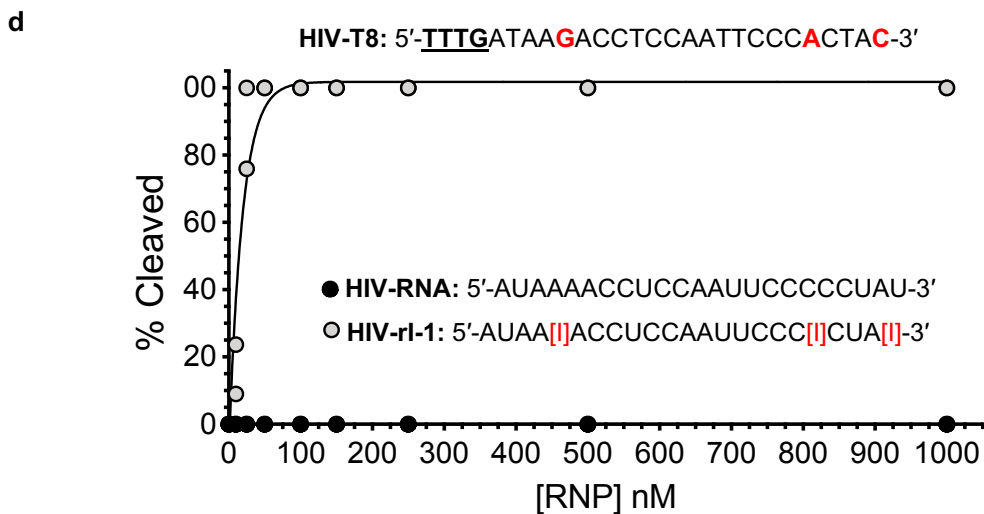

**Supplementary Figure 22. Titration of Cas12a RNP containing HIV-RNA or HIV-rl-1 against select target sequences *in vitro*.** **a** Representative gels showing a titration of Cas12a RNP containing HIV-RNA or HIV-rl-1 crRNAs against the HIV-T1 target sequence. The bottom two bands in the gel represent the cleaved DNA substrate while the top band corresponds to the undigested substrate. **b** Plot quantifying the results of experiments in **a**. DNA target sequences with SNPs are indicated with red lettering. [I] in the crRNA sequence indicates a ribose inosine position. Quantification of cleavage percentages was performed using ImageJ; Individual data points shown (n = 2 independent experiments). **c** Representative gels showing a titration of Cas12a RNP containing HIV-RNA or HIV-rl-1 crRNAs against the HIV-T8 target sequence. The bottom two bands in the gel represent the cleaved DNA substrate while the top band corresponds to the undigested substrate. **d** Plot quantifying the results of experiments in **c**. DNA target sequences with SNPs are indicated with red lettering. Red [I] in the crRNA sequence indicates a ribose inosine position. Quantification of cleavage percentages was performed using ImageJ; Individual data points shown (n = 2 independent experiments). Cleavage experiments were performed in duplicate with similar results.

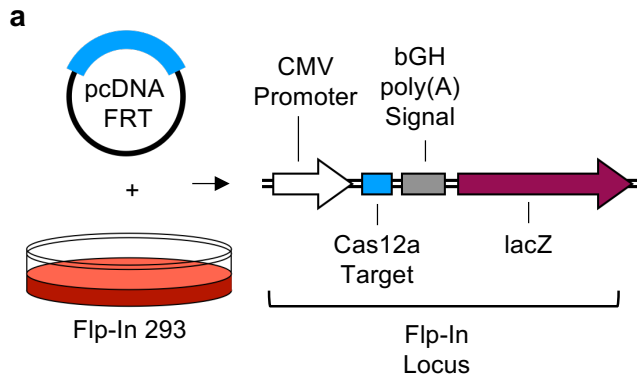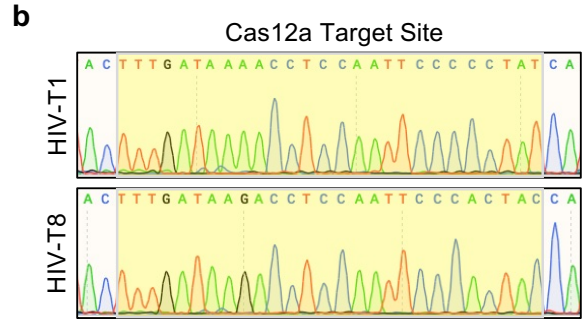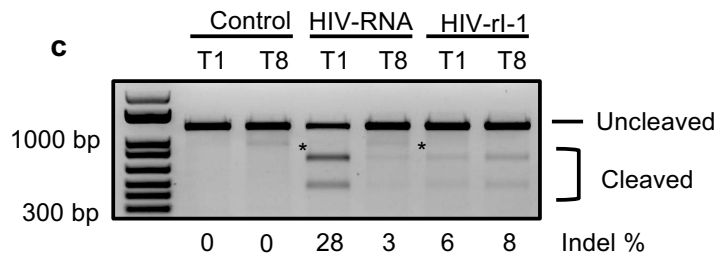

**d**

| Target  | No. of Mismatches | Sequence               |
|---------|-------------------|------------------------|
| HIV-T1  | 0                 | ATAAACCTCCAATTCCCCCTAT |
| HIV-OT1 | 4                 | ATcAcCaTCCAATTCCCCCTAT |
| HIV-OT2 | 4                 | ATAAACCTCtAATTCCataTAT |

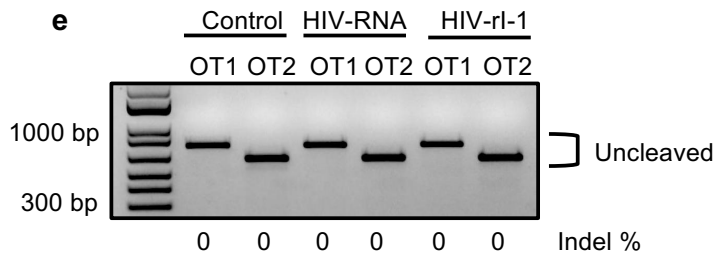

**Supplementary Figure 23. Cleavage of HIV target sequences by Cas12a with**

**unmodified and inosine modified crRNAs in cells.** **a** Diagram illustrating the generation of Flp-In 293 cells containing single-copy genomic HIV DNA target sequences. **b** Sanger sequencing trace confirming DNA target integration. **c** Gel representing cellular Cas12a cleavage efficiencies of the HIV-T1 or HIV-T8 sequences using either the unmodified or ribose inosine-modified HIV crRNAs, as determined by T7 endonuclease I digestion. Control transfections were performed without crRNAs. Indel percentages were determined using densitometry (ImageJ) and are shown below each lane. **d** Potential genomic off-target sequences (OT1: Chr17:40142160, OT2: Chr1:213961893) corresponding to the HIV target sequence (HIV-T1) predicted using Cas-OFFinder (<http://www.rgenome.net/cas-offinder/>)<sup>1</sup>. **e** Gel representing cellular Cas12a cleavage efficiencies of the OT1 or OT2 sequences using either the unmodified or ribose inosine-modified *HIV* crRNAs, as determined by T7 endonuclease I digestion. Control transfections were performed without crRNAs. Indel percentages were determined using densitometry (ImageJ) and are shown below each lane. Cellular cleavage experiments were performed in duplicate with similar results.

**Supplementary Table 1. Sequences of crRNAs and tracrRNA.** [rl] = Ribose inosine, [dl] = Deoxyribose inosine, [ml] = 2'O methyl ribose inosine, [dN] = Deoxyribose 5'-nitroindole, [dK] = Deoxyribose K, [dP] = Deoxyribose P, and /Cy5/ = Cyanine 5.

| Name     | Sequence (5'→3')                                                                              |
|----------|-----------------------------------------------------------------------------------------------|
| HLA-RNA  | rCrArCrArCrArGrArUrCrUrArCrArArGrGrCrCrCrGrUrUrUrUrArGrArGrCrUrArUrGrCrU                      |
| HLA-rl-1 | [rl]rArCrArCrArGrArUrCrUrArCrArArGrGrCrCrCrGrUrUrUrUrArGrArGrCrUrArUrGrCrU                    |
| HLA-rl-2 | rCrArCrArCrArGrArUrCrU[rl]rCrArArGrGrCrCrCrGrUrUrUrUrArGrArGrCrUrArUrGrCrU                    |
| HLA-rl-3 | rCrArCrArCrArGrArUrCrUrArCrArArGrGrCrC[rl]rGrUrUrUrUrArGrArGrCrUrArUrGrCrU                    |
| HLA-rl-4 | rCrArCrArCrArGrArUrCrU[rl]rCrArArGrGrCrC[rl]rGrUrUrUrUrArGrArGrCrUrArUrGrCrU                  |
| HLA-rl-5 | [rl]rArCrArCrArGrArUrCrUrArCrArArGrGrCrC[rl]rGrUrUrUrUrArGrArGrCrUrArUrGrCrU                  |
| HLA-rl-6 | [rl]rArCrArCrArGrArUrCrU[rl]rCrArArGrGrCrCrCrGrUrUrUrUrArGrArGrCrUrArUrGrCrU                  |
| HLA-rl-7 | [rl]rArCrArCrArGrArUrCrU[rl]rCrArArGrGrCrC[rl]rGrUrUrUrUrArGrArGrCrUrArUrGrCrU                |
|          |                                                                                               |
| ABO-RNA  | rCrArUrGrGrArGrUrUrCrCrGrCrGrArCrCrArCrGrGrUrUrUrUrArGrArGrCrUrArUrGrCrU                      |
| ABO-rl-1 | rCrArUrGrGrArG[rl]rUrCrCrGrCrGrArCrCrArC[rl]rGrUrUrUrUrArGrArGrCrUrArUrGrCrU                  |
| ABO-dl-1 | rCrArUrGrGrArG[dl]rUrCrCrGrCrGrArCrCrArC[dl]rGrUrUrUrUrArGrArGrCrUrArUrGrCrU                  |
| ABO-ml-1 | rCrArUrGrGrArG[ml]rUrCrCrGrCrGrArCrCrArC[ml]rGrUrUrUrUrArGrArGrCrUrArUrGrCrU                  |
| ABO-dN-1 | rCrArUrGrGrArG[5NitInd]rUrCrCrGrCrGrArCrCrArC[5NitInd]rGrUrUrUrUrArGrArGrCrUrArUrGrCrU        |
| ABO-dK-1 | rCrArUrGrGrArG[dK]rUrCrCrGrCrGrArCrCrArC[dK]rGrUrUrUrUrArGrArGrCrUrArUrGrCrU                  |
| ABO-dP-1 | rCrArUrGrGrArG[dP]rUrCrCrGrCrGrArCrCrArC[dP]rGrUrUrUrUrArGrArGrCrUrArUrGrCrU                  |
| ABO-rl-2 | rCrArUrGrGrArG[rl]rUrCrCrGrCrGrArCrCrA[rl][rl]rGrUrUrUrUrArGrArGrCrUrArUrGrCrU                |
| ABO-dl-2 | rCrArUrGrGrArG[dl]rUrCrCrGrCrGrArCrCrA[dl][dl]rGrUrUrUrUrArGrArGrCrUrArUrGrCrU                |
| ABO-ml-2 | rCrArUrGrGrArG[ml]rUrCrCrGrCrGrArCrCrA[ml][ml]rGrUrUrUrUrArGrArGrCrUrArUrGrCrU                |
| ABO-dN-2 | rCrArUrGrGrArG[5NitInd]rUrCrCrGrCrGrArCrCrA[5NitInd][5NitInd]rGrUrUrUrUrArGrArGrCrUrArUrGrCrU |

|              |                                                                                |
|--------------|--------------------------------------------------------------------------------|
| ABO-dK-2     | rCrArUrGrGrArG[dK]rUrCrCrGrCrGrArCrCrA[dK][dK]rGrUrUrUrArGrArGrCrUrArUrGrCrU   |
| ABO-dP-2     | rCrArUrGrGrArG[dP]rUrCrCrGrCrGrArCrCrA[dP][dP]rGrUrUrUrArGrArGrCrUrArUrGrCrU   |
| ABO-rl-3     | rCrArUrGrGrArG[rl]rUrCrCrGrCrGrArCrCrArCrGrGrUrUrUrArGrArGrCrUrArUrGrCrU       |
| ABO-rl-4     | rCrArUrGrGrArGrUrUrC[rl]rGrCrGrArCrCrArCrGrGrUrUrUrArGrArGrCrUrArUrGrCrU       |
| ABO-rl-5     | rCrArUrGrGrArGrUrUrCrCrGrCrGrArCrCrA[rl]rGrGrUrUrUrArGrArGrCrUrArUrGrCrU       |
| ABO-rl-6     | rCrArUrGrGrArGrUrUrCrCrGrCrGrArCrCrArC[rl]rGrUrUrUrArGrArGrCrUrArUrGrCrU       |
| ABO-rl-7     | rCrArUrGrGrArG[rl]rUrC[rl]rGrCrGrArCrCrArCrGrGrUrUrUrArGrArGrCrUrArUrGrCrU     |
| ABO-rl-8     | rCrArUrGrGrArG[rl]rUrCrCrGrCrGrArCrCrA[rl]rGrGrUrUrUrArGrArGrCrUrArUrGrCrU     |
| ABO-rl-9     | rCrArUrGrGrArGrUrUrC[rl]rGrCrGrArCrCrA[rl]rGrGrUrUrUrArGrArGrCrUrArUrGrCrU     |
| ABO-rl-10    | rCrArUrGrGrArGrUrUrC[rl]rGrCrGrArCrCrArC[rl]rGrUrUrUrArGrArGrCrUrArUrGrCrU     |
| ABO-rl-11    | rCrArUrGrGrArGrUrUrCrCrGrCrGrArCrCrA[rl][rl]rGrUrUrUrArGrArGrCrUrArUrGrCrU     |
| ABO-rl-12    | rCrArUrGrGrArG[rl]rUrC[rl]rGrCrGrArCrCrA[rl]rGrGrUrUrUrArGrArGrCrUrArUrGrCrU   |
| ABO-rl-13    | rCrArUrGrGrArG[rl]rUrC[rl]rGrCrGrArCrCrArC[rl]rGrUrUrUrArGrArGrCrUrArUrGrCrU   |
| ABO-rl-14    | rCrArUrGrGrArGrUrUrC[rl]rGrCrGrArCrCrA[rl][rl]rGrUrUrUrArGrArGrCrUrArUrGrCrU   |
| ABO-rl-15    | rCrArUrGrGrArG[rl]rUrC[rl]rGrCrGrArCrCrA[rl][rl]rGrUrUrUrArGrArGrCrUrArUrGrCrU |
| ABO-Negative | rGrArGrUrCrCrGrArGrCrArGrArArGrArArGrArArGrUrUrUrArGrArGrCrUrArUrGrCrU         |
|              |                                                                                |
| HLA-C-RNA    | rArArCrArUrGrGrGrArArArGrCrArGrUrUrGrUrUrUrArGrArGrCrUrArUrGrCrU               |
| HLA-C-rl     | rArArCrA[rl]rGrGrGrArArArGrCrArG[rl]rUrGrUrGrUrUrUrArGrArGrCrUrArUrGrCrU       |
| HLA-C-dl     | rArArCrA[dl]rGrGrGrArArArGrCrArG[dl]rUrGrUrGrUrUrUrArGrArGrCrUrArUrGrCrU       |
| HLA-C-dP     | rArArCrA[dP]rGrGrGrArArArGrCrArG[dP]rUrGrUrGrUrUrUrArGrArGrCrUrArUrGrCrU       |
|              |                                                                                |
| HIV-RNA      | rUrArArUrUrCrUrArCrUrCrUrUrGrUrArGrArUrArArArArCrCrUrCrCrArArUrUrCrCrCrCrUrArU |

|          |                                                                                                                                      |
|----------|--------------------------------------------------------------------------------------------------------------------------------------|
| HIV-rl-1 | rUrArArUrUrCrUrArCrUrCrUrUrGrUrArGrArUrArUrArA[rl]rArCrCrUrCrCrArArUrUrCrCrC[rl]rCrUrA[rl]                                           |
| tracrRNA | rArGrCrArUrArGrCrArArGrUrUrArArArArUrArArGrGrCrUrArGrUrCrCrGrUrUrArUrCrArArCrUrUrGrArArArArGrUrGrGrCrArCrCrGrArGrUrCrGrGrUrGrCrUrUrU |

**Supplementary Table 2. Sequences of oligonucleotides.**

| Name                                                                        | Sequences (5'→3')                                   |
|-----------------------------------------------------------------------------|-----------------------------------------------------|
| Oligos used to create <i>in vitro</i> cleavage assay DNA target constructs. |                                                     |
| ABO-T1-F                                                                    | GCCGAAGCTTCTCCACGTGGTCGCGGAACTCCATGCTTCTA<br>GAGGCC |
| ABO-T1-R                                                                    | GGCCTCTAGAAGCATGGAGTTCCGCGACCACGTGGAGAAGC<br>TTCGGC |
| ABO-T2-F                                                                    | GCCGAAGCTTCTCCACGTGGTCGCGGATCTCCATGCTTCTA<br>GAGGCC |
| ABO-T2-R                                                                    | GGCCTCTAGAAGCATGGAGATCCGCGACCACGTGGAGAAG<br>CTTCGGC |
| ABO-T3-F                                                                    | GCCGAAGCTTCTCCACATGGTCGCGGAACTCCATGCTTCTA<br>GAGGCC |
| ABO-T3-R                                                                    | GGCCTCTAGAAGCATGGAGTTCCGCGACCATGTGGAGAAGC<br>TTCGGC |
| ABO-T4-F                                                                    | GCCGAAGCTTCTCCATGTGGTCGCGGAACTCCATGCTTCTA<br>GAGGCC |
| ABO-T4-R                                                                    | GGCCTCTAGAAGCATGGAGTTCCGCGACCACATGGAGAAGC<br>TTCGGC |
| ABO-T5-F                                                                    | GCCGAAGCTTCTCCATGTGGTCGCGGATCTCCATGCTTCTA<br>GAGGCC |
| ABO-T5-R                                                                    | GGCCTCTAGAAGCATGGAGATCCGCGACCACATGGAGAAGC<br>TTCGGC |
| ABO-T6-F                                                                    | GCCGAAGCTTCTCCATATGGTCGCGGATCTCCATGCTTCTAG<br>AGGCC |
| ABO-T6-R                                                                    | GGCCTCTAGAAGCATGGAGATCCGCGACCATATGGAGAAGC<br>TTCGGC |
| ABO-T7-F                                                                    | GCCGAAGCTTCTCCACATGGTCGCGGATCTCCATGCTTCTA<br>GAGGCC |
| ABO-T7-R                                                                    | GGCCTCTAGAAGCATGGAGATCCGCGACCATGTGGAGAAGC<br>TTCGGC |
| ABO-T8-F                                                                    | GCCGAAGCTTCTCCATATGGTCGCGGAACTCCATGCTTCTA<br>GAGGCC |
| ABO-T8-R                                                                    | GGCCTCTAGAAGCATGGAGTTCCGCGACCATATGGAGAAGC<br>TTCGGC |

|                |                                                                   |
|----------------|-------------------------------------------------------------------|
| ABO-T9-F       | GCCGAAGCTTCTCCACGTGGTCGCAGAACTCCATGCTTCTA<br>GAGGCC               |
| ABO-T9-R       | GGCCTCTAGAAGCATGGAGTTCTGCGACCACGTGGAGAAGC<br>TTCGGC               |
| ABO-T10-F      | GCCGAAGCTTCTCCACGTGGTCGCAGATCTCCATGCTTCTA<br>GAGGCC               |
| ABO-T10-R      | GGCCTCTAGAAGCATGGAGATCTGCGACCACGTGGAGAAGC<br>TTCGGC               |
| ABO-T11-F      | GCCGAAGCTTCTCCACATGGTCGCAGAACTCCATGCTTCTA<br>GAGGCC               |
| ABO-T11-R      | GGCCTCTAGAAGCATGGAGTTCTGCGACCATGTGGAGAAGC<br>TTCGGC               |
| ABO-T12-F      | GCCGAAGCTTCTCCATGTGGTCGCAGAACTCCATGCTTCTA<br>GAGGCC               |
| ABO-T12-R      | GGCCTCTAGAAGCATGGAGTTCTGCGACCACATGGAGAAGC<br>TTCGGC               |
| ABO-T13-F      | GCCGAAGCTTCTCCACATGGTCGCAGATCTCCATGCTTCTAG<br>AGGCC               |
| ABO-T13-R      | GGCCTCTAGAAGCATGGAGATCTGCGACCATGTGGAGAAGC<br>TTCGGC               |
| ABO-T14-F      | GCCGAAGCTTCTCCATGTGGTCGCAGATCTCCATGCTTCTAG<br>AGGCC               |
| ABO-T14-R      | GGCCTCTAGAAGCATGGAGATCTGCGACCACATGGAGAAGC<br>TTCGGC               |
| ABO-T15-F      | GCCGAAGCTTCTCCATATGGTCGCAGAACTCCATGCTTCTAG<br>AGGCC               |
| ABO-T15-R      | GGCCTCTAGAAGCATGGAGTTCTGCGACCATATGGAGAAGC<br>TTCGGC               |
| ABO-T16-F      | GCCGAAGCTTCTCCATATGGTCGCAGATCTCCATGCTTCTAG<br>AGGCC               |
| ABO-T16-R      | GGCCTCTAGAAGCATGGAGATCTGCGACCATATGGAGAAGC<br>TTCGGC               |
|                |                                                                   |
| ABO-T5 (G-G)-F | GCC GAA GCT TCT CCA CGT GGT CGC GGA CCT CCA TGC<br>TTC TAG AGG CC |
| ABO-T5 (G-G)-R | GGC CTC TAG AAG CAT GGA GGT CCG CGA CCA CGT GGA<br>GAA GCT TCG GC |
| ABO-T5 (G-C)-F | GCC GAA GCT TCT CCA CGT GGT CGC GGA GCT CCA TGC<br>TTC TAG AGG CC |
| ABO-T5 (G-C)-R | GGC CTC TAG AAG CAT GGA GCT CCG CGA CCA CGT GGA<br>GAA GCT TCG GC |
| ABO-T5 (G-T)-F | GCC GAA GCT TCT CCA CGT GGT CGC GGA ACT CCA TGC<br>TTC TAG AGG CC |
| ABO-T5 (G-T)-R | GGC CTC TAG AAG CAT GGA GTT CCG CGA CCA CGT GGA<br>GAA GCT TCG GC |



|                |                                                                   |
|----------------|-------------------------------------------------------------------|
| ABO-T5 (G-A)-F | GCC GAA GCT TCT CCA CGT GGT CGC GGA TCT CCA TGC<br>TTC TAG AGG CC |
| ABO-T5 (G-A)-R | GGC CTC TAG AAG CAT GGA GAT CCG CGA CCA CGT GGA<br>GAA GCT TCG GC |
| ABO-T5 (C-G)-F | GCC GAA GCT TCT CCA GGT GGT CGC GGA CCT CCA TGC<br>TTC TAG AGG CC |
| ABO-T5 (C-G)-R | GGC CTC TAG AAG CAT GGA GGT CCG CGA CCA CCT GGA<br>GAA GCT TCG GC |
| ABO-T5 (C-C)-F | GCC GAA GCT TCT CCA GGT GGT CGC GGA GCT CCA TGC<br>TTC TAG AGG CC |
| ABO-T5 (C-C)-R | GGC CTC TAG AAG CAT GGA GCT CCG CGA CCA CCT GGA<br>GAA GCT TCG GC |
| ABO-T5 (C-T)-F | GCC GAA GCT TCT CCA GGT GGT CGC GGA ACT CCA TGC<br>TTC TAG AGG CC |
| ABO-T5 (C-T)-R | GGC CTC TAG AAG CAT GGA GTT CCG CGA CCA CCT GGA<br>GAA GCT TCG GC |
| ABO-T5 (C-A)-F | GCC GAA GCT TCT CCA GGT GGT CGC GGA TCT CCA TGC<br>TTC TAG AGG CC |
| ABO-T5 (C-A)-R | GGC CTC TAG AAG CAT GGA GAT CCG CGA CCA CCT GGA<br>GAA GCT TCG GC |
| ABO-T5 (T-G)-F | GCC GAA GCT TCT CCA AGT GGT CGC GGA CCT CCA TGC<br>TTC TAG AGG CC |
| ABO-T5 (T-G)-R | GGC CTC TAG AAG CAT GGA GGT CCG CGA CCA CTT GGA<br>GAA GCT TCG GC |
| ABO-T5 (T-C)-F | GCC GAA GCT TCT CCA AGT GGT CGC GGA GCT CCA TGC<br>TTC TAG AGG CC |
| ABO-T5 (T-C)-R | GGC CTC TAG AAG CAT GGA GCT CCG CGA CCA CTT GGA<br>GAA GCT TCG GC |
| ABO-T5 (T-T)-F | GCC GAA GCT TCT CCA AGT GGT CGC GGA ACT CCA TGC<br>TTC TAG AGG CC |
| ABO-T5 (T-T)-R | GGC CTC TAG AAG CAT GGA GTT CCG CGA CCA CTT GGA<br>GAA GCT TCG GC |
| ABO-T5 (T-A)-F | GCC GAA GCT TCT CCA AGT GGT CGC GGA TCT CCA TGC<br>TTC TAG AGG CC |
| ABO-T5 (T-A)-R | GGC CTC TAG AAG CAT GGA GAT CCG CGA CCA CTT GGA<br>GAA GCT TCG GC |
| ABO-T5 (A-G)-F | GCC GAA GCT TCT CCA TGT GGT CGC GGA CCT CCA TGC<br>TTC TAG AGG CC |
| ABO-T5 (A-G)-R | GGC CTC TAG AAG CAT GGA GGT CCG CGA CCA CAT GGA<br>GAA GCT TCG GC |
| ABO-T5 (A-C)-F | GCC GAA GCT TCT CCA TGT GGT CGC GGA GCT CCA TGC<br>TTC TAG AGG CC |
| ABO-T5 (A-C)-R | GGC CTC TAG AAG CAT GGA GCT CCG CGA CCA CAT GGA<br>GAA GCT TCG GC |
| ABO-T5 (A-T)-F | GCC GAA GCT TCT CCA TGT GGT CGC GGA ACT CCA TGC<br>TTC TAG AGG CC |

|                |                                                                   |
|----------------|-------------------------------------------------------------------|
| ABO-T5 (A-T)-R | GGC CTC TAG AAG CATGGAGTTCCGCGACCACATGGA GAA<br>GCT TCG GC        |
| ABO-T5 (A-A)-F | GCC GAA GCT TCT CCATGTGGT CGC GGA TCT CCA TGC<br>TTC TAG AGG CC   |
| ABO-T5 (A-A)-R | GGC CTC TAG AAG CATGGAGATCCGCGACCACATGGA GAA<br>GCT TCG GC        |
|                |                                                                   |
| ABO-T7 (G-G)-F | GCC GAA GCT TCT CCA CCT GGT CGC GGA CCT CCA TGC<br>TTC TAG AGG CC |
| ABO-T7 (G-G)-R | GGC CTC TAG AAG CATGGAGGTCCGCGACCAGGTGGA<br>GAA GCT TCG GC        |
| ABO-T7 (G-C)-F | GCC GAA GCT TCT CCA CCT GGT CGC GGA GCT CCA TGC<br>TTC TAG AGG CC |
| ABO-T7 (G-C)-R | GGC CTC TAG AAG CATGGAGCTCCGCGACCAGGTGGA<br>GAA GCT TCG GC        |
| ABO-T7 (G-T)-F | GCC GAA GCT TCT CCA CCT GGT CGC GGA ACT CCA TGC<br>TTC TAG AGG CC |
| ABO-T7 (G-T)-R | GGC CTC TAG AAG CATGGAGTTCCGCGACCAGGTGGA GAA<br>GCT TCG GC        |
| ABO-T7 (G-A)-F | GCC GAA GCT TCT CCA CCT GGT CGC GGA TCT CCA TGC<br>TTC TAG AGG CC |
| ABO-T7 (G-A)-R | GGC CTC TAG AAG CATGGAGATCCGCGACCAGGTGGA GAA<br>GCT TCG GC        |
| ABO-T7 (C-G)-F | GCC GAA GCT TCT CCA CGT GGT CGC GGA CCT CCA TGC<br>TTC TAG AGG CC |
| ABO-T7 (C-G)-R | GGC CTC TAG AAG CATGGAGGTCCGCGACCACGTGGA<br>GAA GCT TCG GC        |
| ABO-T7 (C-C)-F | GCC GAA GCT TCT CCA CGT GGT CGC GGA GCT CCA TGC<br>TTC TAG AGG CC |
| ABO-T7 (C-C)-R | GGC CTC TAG AAG CATGGAGCTCCGCGACCACGTGGA GAA<br>GCT TCG GC        |
| ABO-T7 (C-T)-F | GCC GAA GCT TCT CCA CGT GGT CGC GGA ACT CCA TGC<br>TTC TAG AGG CC |
| ABO-T7 (C-T)-R | GGC CTC TAG AAG CAT GGA GTT CCG CGA CCA CGT GGA<br>GAA GCT TCG GC |
| ABO-T7 (C-A)-F | GCC GAA GCT TCT CCA CGT GGT CGC GGA TCT CCA TGC<br>TTC TAG AGG CC |
| ABO-T7 (C-A)-R | GGC CTC TAG AAG CATGGAGATCCGCGACCACGTGGA GAA<br>GCT TCG GC        |
| ABO-T7 (T-G)-F | GCC GAA GCT TCT CCA CAT GGT CGC GGA CCT CCA TGC<br>TTC TAG AGG CC |
| ABO-T7 (T-G)-R | GGC CTC TAG AAG CATGGAGGTCCGCGACCATGTGGA GAA<br>GCT TCG GC        |
| ABO-T7 (T-C)-F | GCC GAA GCT TCT CCA CAT GGT CGC GGA GCT CCA TGC<br>TTC TAG AGG CC |

|                |                                                                   |
|----------------|-------------------------------------------------------------------|
| ABO-T7 (T-C)-R | GGC CTC TAG AAG CATGGAGCTCCGCGACCATGTGGA GAA<br>GCT TCG GC        |
| ABO-T7 (T-T)-F | GCC GAA GCT TCT CCA CAT GGT CGC GGA ACT CCA TGC<br>TTC TAG AGG CC |
| ABO-T7 (T-T)-R | GGC CTC TAG AAG CATGGAGTTCCGCGACCATGTGGA GAA<br>GCT TCG GC        |
| ABO-T7 (T-A)-F | GCC GAA GCT TCT CCA CAT GGT CGC GGA TCT CCA TGC<br>TTC TAG AGG CC |
| ABO-T7 (T-A)-R | GGC CTC TAG AAG CATGGAGATCCGCGACCATGTGGA GAA<br>GCT TCG GC        |
| ABO-T7 (A-G)-F | GCC GAA GCT TCT CCA CTT GGT CGC GGA CCT CCA TGC<br>TTC TAG AGG CC |
| ABO-T7 (A-G)-R | GGC CTC TAG AAG CATGGAGGTCCGCGACCAAGTGGGA GAA<br>GCT TCG GC       |
| ABO-T7 (A-C)-F | GCC GAA GCT TCT CCA CTT GGT CGC GGA GCT CCA TGC<br>TTC TAG AGG CC |
| ABO-T7 (A-C)-R | GGC CTC TAG AAG CATGGAGCTCCGCGACCAAGTGGGA GAA<br>GCT TCG GC       |
| ABO-T7 (A-T)-F | GCC GAA GCT TCT CCA CTT GGT CGC GGA ACT CCA TGC<br>TTC TAG AGG CC |
| ABO-T7 (A-T)-R | GGC CTC TAG AAG CATGGAGTTCCGCGACCAAGTGGGA GAA<br>GCT TCG GC       |
| ABO-T7 (A-A)-F | GCC GAA GCT TCT CCA CTT GGT CGC GGA TCT CCA TGC<br>TTC TAG AGG CC |
| ABO-T7 (A-A)-R | GGC CTC TAG AAG CATGGAGATCCGCGACCAAGTGGGA GAA<br>GCT TCG GC       |
|                |                                                                   |
| HIV-T1-F       | GCC GAA GCT TCT TTTGATAAAACCTCCAATTCCCCCTATC<br>TTC TAG AGG CC    |
| HIV-T1-R       | GGC CTC TAG AAG ATAGGGGGAATTGGAGGTTTTATCAAAA<br>GAA GCT TCG GC    |
| HIV-T2-F       | GCC GAA GCT TCT TTTGATAAGACCTCCAATTCCCCCTATC<br>TTC TAG AGG CC    |
| HIV-T2-R       | GGC CTC TAG AAG ATAGGGGGAATTGGAGGTCTTATCAAAA<br>A GAA GCT TCG GC  |
| HIV-T3-F       | GCC GAA GCT TCT TTTGATAAAACCTCCAATTCCCCTATC<br>TTC TAG AGG CC     |
| HIV-T3-R       | GGC CTC TAG AAG ATAGTGGGAATTGGAGGTTTTATCAAAA<br>GAA GCT TCG GC    |
| HIV-T4-F       | GCC GAA GCT TCT TTTGATAAAACCTCCAATTCCCCCTACC<br>TTC TAG AGG CC    |
| HIV-T4-R       | GGC CTC TAG AAG GTAGGGGGAATTGGAGGTTTTATCAAAA<br>A GAA GCT TCG GC  |
| HIV-T5-F       | GCC GAA GCT TCT TTTGATAAGACCTCCAATTCCCCTATC<br>TTC TAG AGG CC     |

|            |                                                                 |
|------------|-----------------------------------------------------------------|
| HIV-T5-R   | GGC CTC TAG AAG ATAGTGGGAATTGGAGGTCTTATCAAAA<br>GAA GCT TCG GC  |
| HIV-T6-F   | GCC GAA GCT TCT TTTGATAAGACCTCCAATTCCCCCTACC<br>TTC TAG AGG CC  |
| HIV-T6-R   | GGC CTC TAG AAG GTAGGGGGAATTGGAGGTCTTATCAAA<br>A GAA GCT TCG GC |
| HIV-T7-F   | GCC GAA GCT TCT TTTGATAAACCTCCAATTCCCCTACC<br>TTC TAG AGG CC    |
| HIV-T7-R   | GGC CTC TAG AAG GTAGTGGGAATTGGAGGTTTTATCAAAA<br>GAA GCT TCG GC  |
| HIV-T8-F   | GCC GAA GCT TCT TTTGATAAGACCTCCAATTCCCCTACC<br>TTC TAG AGG CC   |
| HIV-T8-R   | GGC CTC TAG AAG GTAGTGGGAATTGGAGGTCTTATCAAA<br>A GAA GCT TCG GC |
| Negative-F | GCC GAA GCT TCT TTTGATTCTTGCTCTGCTCTCTTCGTCC<br>TTC TAG AGG CC  |
| Negative-R | GGC CTC TAG AAG GACGAAGAGAGCAGAGCAAGAATCAAA<br>A GAA GCT TCG GC |
| pUC19_F    | CAGCGAGTCAGTGAGCGA                                              |
| pUC19_R    | GCGACACGGAAATGTTGAATACTCAT                                      |
| HLA-C-F    | ACACACTCGAAACGTCCCAA                                            |
| HLA-C-R    | AAGTCCTTCTGGAGCCCTTC                                            |

| Name                                                              | Sequences (5'→3')                                                                       |
|-------------------------------------------------------------------|-----------------------------------------------------------------------------------------|
| Oligos used in <i>in vitro</i> high throughput assay experiments. |                                                                                         |
| HLA-library                                                       | /5'Phos/TTGTGTNNNNC*C*NG*G*G*C*C*T*T*G*T*A*G*A*T<br>*C*T*G*T*G*T*G*NNNNACCTGCCGAGTTGTGT |
| ABO-library                                                       | /5'Phos/AGAGAANNNNC*C*NC*G*T*G*G*T*C*G*C*G*G*A*<br>A*C*T*C*C*A*T*G*NNNNACCTGCCGAGAGAGAA |
| S501-F                                                            | AATGATACGGCGACCACCGAGATCTACACTCTTTCCCTA<br>CACGACGCTCTTCCGATCT <b>TAGATCGC</b>          |
| S501-R                                                            | GCGATCTAAGATCGGAAGAGCGTCGTGTAGGGAAAGAG<br>TGTAGATCTCGGTGG                               |
| S502-F                                                            | AATGATACGGCGACCACCGAGATCTACACTCTTTCCCTA<br>CACGACGCTCTTCCGATCT <b>TCTCTAT</b>           |
| S502-R                                                            | ATAGAGAGAGATCGGAAGAGCGTCGTGTAGGGAAAGAG<br>TGTAGATCTCGGTGG                               |
| S503-F                                                            | AATGATACGGCGACCACCGAGATCTACACTCTTTCCCTA<br>CACGACGCTCTTCCGATCT <b>TATCCTCT</b>          |
| S503-R                                                            | AGAGGATAAGATCGGAAGAGCGTCGTGTAGGGAAAGAG<br>TGTAGATCTCGGTGG                               |

|                  |                                                                                                                     |
|------------------|---------------------------------------------------------------------------------------------------------------------|
| S504-F           | AATGATACGGCGACCACCGAGATCTACACTCTTTCCCTA<br>CACGACGCTCTTCCGATCT <b>AGAGTAGA</b>                                      |
| S504-R           | TCTACTCTAGATCGGAAGAGCGTCGTGTAGGGAAAGAGT<br>GTAGATCTCGGTGG                                                           |
| S505-F           | AATGATACGGCGACCACCGAGATCTACACTCTTTCCCTA<br>CACGACGCTCTTCCGATCT <b>GTAAGGAG</b>                                      |
| S505-R           | CTCCTTACAGATCGGAAGAGCGTCGTGTAGGGAAAGAGT<br>GTAGATCTCGGTGG                                                           |
| S506-F           | AATGATACGGCGACCACCGAGATCTACACTCTTTCCCTA<br>CACGACGCTCTTCCGATCT <b>ACTGCATA</b>                                      |
| S506-R           | TATGCAGTAGATCGGAAGAGCGTCGTGTAGGGAAAGAG<br>TGTAGATCTCGGTGG                                                           |
| S507-F           | AATGATACGGCGACCACCGAGATCTACACTCTTTCCCTA<br>CACGACGCTCTTCCGATCT <b>AAGGAGTA</b>                                      |
| S507-R           | TACTCCTTAGATCGGAAGAGCGTCGTGTAGGGAAAGAGT<br>GTAGATCTCGGTGG                                                           |
| S508-F           | AATGATACGGCGACCACCGAGATCTACACTCTTTCCCTA<br>CACGACGCTCTTCCGATCT <b>CTAAGCCT</b>                                      |
| S508-R           | AGGCTTAGAGATCGGAAGAGCGTCGTGTAGGGAAAGAG<br>TGTAGATCTCGGTGG                                                           |
| HLA-N701         | CAAGCAGAAGACGGCATAACGAGAT <b>TCGCCTTA</b> ACCTGCC<br>GAGTTGTGT                                                      |
| HLA-N702         | CAAGCAGAAGACGGCATAACGAGAT <b>CGTACTAG</b> ACCTGC<br>CGAGTTGTGT                                                      |
| HLA-N703         | CAAGCAGAAGACGGCATAACGAGAT <b>TTCTGCCT</b> ACCTGCC<br>GAGTTGTGT                                                      |
| ABO-N705         | CAAGCAGAAGACGGCATAACGAGAT <b>AGGAGTCC</b> ACCTGC<br>CGAGAGAGAA                                                      |
| ABO-N706         | CAAGCAGAAGACGGCATAACGAGAT <b>CATGCCTA</b> ACCTGC<br>CGAGAGAGAA                                                      |
| ABO-N707         | CAAGCAGAAGACGGCATAACGAGAT <b>GTAGAGAG</b> ACCTGC<br>CGAGAGAGAA                                                      |
| ABO-N708         | CAAGCAGAAGACGGCATAACGAGAT <b>CCTCTCTG</b> ACCTGCC<br>GAGAGAGAA                                                      |
| PE2_short        | AAT GAT ACG GCG ACC ACC GA                                                                                          |
| HLA_sel_PCR      | CAA GCA GAA GAC GGC ATA CGA GAT ACC TGC CGA<br>GTT GTG T                                                            |
| ABO_sel_PCR      | CAA GCA GAA GAC GGC ATA CGA GAT ACC TGC CGA<br>GAG AGA A                                                            |
| Lib_adaptor1     | GAC GGC ATA CGA GAT                                                                                                 |
| HLA_lib_adaptor2 | TTG TAT CTC GTA TGC CGT CTT CTG CTT G                                                                               |
| ABO_lib_adaptor2 | AGA GAT CTC GTA TGC CGT CTT CTG CTT G                                                                               |
| lib_PCR_F        | CAA GCA GAA GAC GGC ATA CGA GAT                                                                                     |
| HLA_PCR_R        | AAT GAT ACG GCG ACC ACC GAG ATC TAC ACT CTT<br>TCC CTA CAC GAC GCT CTT CCG ATC TNN NNA CCT<br>ACC TGC CGA GTT GTG T |

|           |                                                                                                                     |
|-----------|---------------------------------------------------------------------------------------------------------------------|
| ABO_PCR_R | AAT GAT ACG GCG ACC ACC GAG ATC TAC ACT CTT<br>TCC CTA CAC GAC GCT CTT CCG ATC TNN NNA CCT<br>ACC TGC CGA GAG AGA A |
|-----------|---------------------------------------------------------------------------------------------------------------------|

NNNNNNN = Library barcode, **NNNNNNNN** = target barcode

An asterisk (\*) indicates that the preceding nucleotide was incorporated as a hand mix of bases consisting of 79 mol % of the indicated base, and 7 mol % of each of the other three natural bases. "/5Phos/" denotes a 5' phosphate group added to the sequence.

| Name                                                                  | Sequences (5'→3')                      |
|-----------------------------------------------------------------------|----------------------------------------|
| Oligos used to create DNA target constructs in a cell reporter assay. |                                        |
| ABO-T1-REP-F                                                          | AATTCC CATGGAGTTCGCGACCACGTGG AGGAG    |
| ABO-T1-REP-R                                                          | GATCCTCCT CCACGTGGTCGCGGAACTCCATG GG   |
| ABO-T2-REP-F                                                          | AATTCC CATGGAGATCCGCGACCACGTGG AGGAG   |
| ABO-T2-REP-R                                                          | GATCCTCCT CCACGTGGTCGCGGATCTCCATG GG   |
| ABO-T3-REP-F                                                          | AATTCC CATGGAGTTCGCGACCACATGTGG AGGAG  |
| ABO-T3-REP-R                                                          | GATCCTCCT CCACATGGTCGCGGAACTCCATG GG   |
| ABO-T4-REP-F                                                          | AATTCC CATGGAGTTCGCGACCACATGG AGGAG    |
| ABO-T4-REP-R                                                          | GATCCTCCT CCATGTGGTCGCGGAACTCCATG GG   |
| ABO-T5-REP-F                                                          | AATTCC CATGGAGATCCGCGACCACATGG AGGAG   |
| ABO-T5-REP-R                                                          | GATCCTCCT CCATGTGGTCGCGGATCTCCATG GG   |
| ABO-T6-REP-F                                                          | AATTCC CATGGAGATCCGCGACCATATGG AGGAG   |
| ABO-T6-REP-R                                                          | GATCCTCCT CCATATGGTCGCGGATCTCCATG GG   |
| ABO-T7-REP-F                                                          | AATTCC CATGGAGATCCGCGACCACATGTGG AGGAG |
| ABO-T7-REP-R                                                          | GATCCTCCT CCACATGGTCGCGGATCTCCATG GG   |
| ABO-T8-REP-F                                                          | AATTCC CATGGAGTTCGCGACCACATATGG AGGAG  |
| ABO-T8-REP-R                                                          | GATCCTCCT CCATATGGTCGCGGAACTCCATG GG   |

| Name                                                                 | Sequences (5'→3')         |
|----------------------------------------------------------------------|---------------------------|
| Oligo used as ssDNA target in melting temperature assay experiments. |                           |
| ABO-T1-Tm                                                            | CCCACGTGGTCGCGGAACTCCATGT |

| Name                                                    | Sequences (5'→3')                     |
|---------------------------------------------------------|---------------------------------------|
| Oligos used for dsDNA target in EMSA assay experiments. |                                       |
| ABO-T1-EMSA-F                                           | CAATA CCACGTGGTCGCGGAACTCCATG         |
| ABO-T1-EMSA-R                                           | CATGGAGTTCGCGACCACGTGG TATTGCGC/Cy5/  |
| ABO-T5-EMSA-F                                           | CAATA CCATGTGGTCGCGGATCTCCATG         |
| ABO-T5-EMSA-R                                           | CATGGAGATCCGCGACCACATGG TATTGCGC/Cy5/ |

|                |                                       |
|----------------|---------------------------------------|
| ABO-T7-EMSA-F  | CAATA CCACATGGTCGCGGATCTCCATG         |
| ABO-T7-EMSA-R  | CATGGAGATCCGCGACCATGTGG TATTGCGC/Cy5/ |
| ABO-Neg-EMSA-F | CAATA CCTGTGCCTTGTAGATCTGTGTG         |
| ABO-Neg-EMSA-R | CACACAGATCTACAAGGCACAGG TATTGCGC/Cy5/ |

/Cy5/ refers to Cyanine 5.

| Name                                                | Sequences (5'→3')                                                                            |
|-----------------------------------------------------|----------------------------------------------------------------------------------------------|
| Oligos used in cellular cleavage assay experiments. |                                                                                              |
| HLA-C-F                                             | ACACACTCGAAACGTCCCAA                                                                         |
| HLA-C-R                                             | AAGTCCTTCTGGAGCCCTTC                                                                         |
| HIV-T1-Flp-F                                        | GATCCCGAGTGAAGATGGAAACCAAAAATGATAGGGGG<br>AATTGGAGGTTTTATCAAAGTAAGACAGTATGATCAGATC<br>GGCCGC |
| HIV-T1-Flp-R                                        | TCGAGCGGCCGATCTGATCATACTGTCTTACTTTGATAAA<br>ACCTCCAATTCCCCCTATCATTTTTGGTTTCCATCTTCACT<br>CGG |
| HIV-T8-Flp-F                                        | GATCCCGAGTGAAGATGGAAACCAAAAATGGTAGTGGGA<br>ATTGGAGGTCTTATCAAAGTAAGACAGTATGATCAGATC<br>GGCCGC |
| HIV-T8-Flp-R                                        | TCGAGCGGCCGATCTGATCATACTGTCTTACTTTGATAAG<br>ACCTCCAATTCCCACTACCATTTTTGGTTTCCATCTTCAC<br>TCGG |
| FlpLocus-F                                          | CGATGTACGGGCCAGATATAC                                                                        |
| FlpLocus-R                                          | AGGGAAGAAAGCGAAAGGAG                                                                         |
| HIV-OT1-F                                           | CGTGTACACACCTTCGTTGC                                                                         |
| HIV-OT1-R                                           | TCCCGACTGCCTAAGATGGA                                                                         |
| HIV-OT2-F                                           | GCTCTCTTGCCCATGGAGTT                                                                         |
| HIV-OT2-R                                           | AATTGGGGCCTTGAGACCAG                                                                         |

## **REFERENCES**

- 1 Bae, S., Park, J. & Kim, J. S. Cas-OFFinder: a fast and versatile algorithm that searches for potential off-target sites of Cas9 RNA-guided endonucleases. *Bioinformatics* **30**, 1473-1475, doi:10.1093/bioinformatics/btu048 (2014).
